# Supplementary material
Source: PubMed Central journal article supplement (PMC3715320)
Supplement: NIHMS455396-supplement-3.pdf [file NIHMS455396-supplement-3.pdf]

## SUPPLEMENTARY MATERIAL

### SUPPLEMENTAL METHODS

#### Study Populations

*Amish Pharmacogenomics of Antiplatelet Intervention (PAPI) Study.* The Amish Pharmacogenomics of Antiplatelet Intervention (PAPI) Study (NCT0079936) recruited 565 apparently healthy Caucasian individuals 20 years old or older between August 2006 and January 2010. This population has been described in detail previously (11).

Informative relative pairs for estimating heritability using this population consisted of 164 parent-offspring pairs, 286 sibling pairs, 87 avuncular pairs, and 8 first-cousin pairs. Participants were extensively phenotyped and physical examinations, medical and family histories, anthropometric measures, and blood samples after an overnight fast were obtained. Complete blood count with platelet numbers and levels of serum lipids (total cholesterol, high-density lipoprotein cholesterol, and triglycerides) were assayed by Quest Diagnostics (Horsham, Pennsylvania); levels of low-density lipoprotein cholesterol were calculated using the Friedewald equation.

All medications, vitamins and supplements were discontinued at least 1 week prior to baseline studies. Platelet-rich plasma (PRP) was isolated from blood samples of participants and baseline platelet function was assessed by optical aggregometry using a PAP8E Aggregometer (Bio/Data Corporation, Horsham, Pennsylvania) after stimulation with collagen (5  $\mu$ g/ml) and was expressed as the maximal percentage change in light transmittance using platelet-poor plasma as a referent. After baseline platelet aggregation measurements, participants were given a 300 mg oral loading dose of clopidogrel followed by 75 mg per day for 6 days. One hour following the last dose of clopidogrel,

platelet aggregation measurements were repeated. A second follow-up platelet aggregation measurement was made later the same day, 1 hour after oral ingestion of 324 mg of chewable aspirin.

*Sinai Hospital of Baltimore Study Patients.* The Sinai Hospital of Baltimore Study (NCT00370045) enrolled 227 patients older than 18 years and undergoing nonemergent percutaneous coronary intervention (PCI) between January 2004 and May 2007. Detailed recruitment of these patients has been described previously (11). Of the recruited patients, 140 (61.7%) were Caucasian, 83 (36.6%) were African American, and 4 (1.8%) were of other race/ethnicity. Race/ethnicity information was obtained by self-report. Directly preceding the PCI, patients received either a 600 mg (n = 112) or a 300 mg (n = 25) loading dose of clopidogrel; 90 patients were already receiving maintenance therapy with a 75-mg daily dose at the time of PCI and received no loading dose. Patients also received 81 to 325 mg of aspirin daily for at least 1 week prior to PCI and 325 mg on the day of the procedure. There were no differences in baseline characteristic or in the long-term outcomes investigated in stratified analyses of acute clopidogrel dosing; thus these groups were combined for further analyses.

Anticoagulant therapy including bivalirudin or heparin, either with (n = 107) or without (n = 120) eptifibatide, was discontinued at the completion of the procedure in all patients. To minimize the effects of acute anticoagulant therapy during PCI, platelet function was measured on the day of hospital discharge in patients not treated with eptifibatide or 5 days or more post-discharge in patients treated with eptifibatide.

Platelet function measurements in response to collagen were available for 153 patients taking aspirin at the time of enrollment, and results of baseline and post-

clopidogrel platelet aggregation studies in response to ADP were available for 202 and 188 patients respectively. Platelet aggregation was assessed in PRP after stimulation with 2 µg/ml collagen using a Chronolog Lumi-Aggregometer (Model 490-4D; Chronolog, Havertown, Pennsylvania), and was expressed as the maximal percentage change in light transmittance using platelet-poor plasma as a referent as described previously (8). Aspirin (325 mg/d) and clopidogrel (75 mg/d) were prescribed for all patients at the time of hospital discharge, according to the American College of Cardiology/American Heart Association guidelines (27). We assessed medication adherence by self-report and by review of source documents from hospitalizations for ischemic events.

Enrolled patients were contacted at the end of 1 and 12 months post-PCI to determine the occurrence of post-discharge cardiovascular ischemic events. A physician, blinded to the study results of the patient, adjudicated all end points through review of source documents obtained from medical records. Post-discharge ischemic events were defined as myocardial infarction (the occurrence of ischemic symptoms and a troponin I value greater than the upper limit of normal), ischemic stroke, stent thrombosis (definite stent thrombosis according to the Academic Research Consortium (28)), unplanned target vessel revascularization (revascularization of a vessel different from that treated at the time of enrollment), hospitalization for coronary ischemia without revascularization (hospitalization for chest pain with evidence of ischemia on electrocardiogram and no evidence of myocardial infarction as measured by troponin I value, and death secondary to any cardiovascular cause).

*INternational VERapamil SR/trandolapril STudy GENETic Substudy.* The INternational VERapamil SR/trandolapril STudy (INVEST) GENETic Substudy (INVEST-GENES) has been previously described (23). Briefly, genomic DNA from 5,979 INVEST patients with hypertension and stable coronary artery disease residing in the mainland United States and Puerto Rico were collected. Using these samples, a nested case-control group consisting of 361 patients who experienced the primary outcome (defined as first occurrence of death, nonfatal myocardial infarction, or nonfatal stroke) and 639 age-, sex-, and race-frequency-matched controls were evaluated. Individual components of the primary outcome were also assessed. All components of the primary outcome were adjudicated by an independent adjudication committee (24). In this sample, 570 (56.8%) participants were Caucasian, 154 (15.3%) were African American, and 276 (27.5%) were Hispanic. Information on race/ethnicity was obtained by self-report. Of these individuals, 499 were taking aspirin (dose unknown) and 501 were not.

All study protocols were approved by the respective institutional review boards at the University of Maryland, Sinai Hospital of Baltimore, and the University of Florida. Written informed consent was obtained from each participant; participants were compensated for their participation.

## SUPPLEMENTARY TABLES

**Supplementary Table 1. Multivariate Analysis of Dual Anti-Platelet Therapy Response as Measured by Collagen-Stimulated Platelet Aggregation in PAPI Study Participants (n = 565)**

| Characteristic           | $\beta \pm SE$ | P-value <sup>a</sup> | Variance of Significant Predictors (%) |
|--------------------------|----------------|----------------------|----------------------------------------|
| Age                      | 0.31 ± 0.03    | <0.001               | 12.1                                   |
| Sex                      | 3.02 ± 0.90    | 0.001                | 2.5                                    |
| BMI                      | -0.18 ± 0.10   | 0.08                 |                                        |
| Total cholesterol        | 0.01 ± 0.01    | 0.34                 |                                        |
| HDL cholesterol          | 0.001 ± 0.03   | 0.96                 |                                        |
| LDL cholesterol          | 0.01 ± 0.01    | 0.26                 |                                        |
| Log triglycerides        | -0.01 ± 0.01   | 0.27                 |                                        |
| Systolic blood pressure  | -0.05 ± 0.04   | 0.22                 |                                        |
| Diastolic blood pressure | -0.10 ± 0.07   | 0.15                 |                                        |

Abbreviations: BMI, body mass index; HDL, high-density lipoprotein; LDL, low-density lipoprotein; PAPI, Pharmacogenomics of Antiplatelet Intervention.

<sup>a</sup>All p-values adjusted for age, sex, and pre-clopidogrel/pre-aspirin collagen (5µg/ml)-stimulated platelet aggregation except age adjusted for sex and pre-clopidogrel/pre-aspirin platelet aggregation and sex adjusted for age and pre-clopidogrel/pre-aspirin platelet aggregation.

**Supplementary Table 2. Summary GWAS Results from the Amish PAPI Study of All SNPs Associated with Collagen-Stimulated Platelet Aggregation after Aspirin and Clopidogrel Treatment with P-values < 1.0 x 10<sup>-5</sup>**

| rs Number  | Chr. | Position  | Major Allele | Minor Allele | Minor Allele Frequency | Mean Maximal Platelet Aggregation |               |                          | Additive P-value |
|------------|------|-----------|--------------|--------------|------------------------|-----------------------------------|---------------|--------------------------|------------------|
|            |      |           |              |              |                        | Major Allele Homozygotes          | Heterozygotes | Minor Allele Homozygotes |                  |
| rs2148135  | 1    | 156050109 | T            | C            | 0.43                   | 13.1                              | 18.6          | 25.2                     | 4.84E-08         |
| rs11264825 | 1    | 156054894 | C            | T            | 0.44                   | 13.1                              | 18.4          | 24.8                     | 8.10E-08         |
| rs6696137  | 1    | 156049205 | C            | T            | 0.42                   | 13.1                              | 18.6          | 25.4                     | 1.11E-07         |
| rs7534239  | 1    | 155325048 | T            | C            | 0.49                   | 13.2                              | 18.0          | 22.3                     | 2.33E-07         |
| rs16831160 | 3    | 175058110 | G            | A            | 0.06                   | 18.5                              | 11.2          | 6.7                      | 7.07E-07         |
| rs1176535  | 1    | 155328174 | T            | C            | 0.48                   | 13.4                              | 18.4          | 21.8                     | 9.13E-07         |
| rs7210295  | 17   | 51477739  | G            | A            | 0.15                   | 19.6                              | 13.3          | 9.9                      | 1.03E-06         |
| rs1300252  | 10   | 70172432  | A            | C            | 0.08                   | 19.0                              | 11.2          | 7.5                      | 1.34E-06         |
| rs8066419  | 17   | 51475956  | C            | G            | 0.15                   | 19.6                              | 13.5          | 9.9                      | 1.38E-06         |
| rs10740315 | 10   | 70351384  | C            | T            | 0.09                   | 19.2                              | 11.4          | 9.4                      | 1.53E-06         |
| rs9807083  | 17   | 51477132  | C            | T            | 0.17                   | 19.9                              | 13.9          | 11.4                     | 1.58E-06         |
| rs11239104 | 10   | 44330302  | G            | A            | 0.15                   | 19.3                              | 13.8          | 12.6                     | 2.20E-06         |
| rs1387657  | 10   | 55167590  | G            | A            | 0.26                   | 20.0                              | 15.5          | 11.7                     | 2.34E-06         |
| rs7068100  | 10   | 55158579  | C            | T            | 0.26                   | 20.0                              | 15.6          | 11.7                     | 2.40E-06         |
| rs9394755  | 6    | 41114658  | T            | C            | 0.16                   | 19.3                              | 14.2          | 14.2                     | 2.52E-06         |
| rs10825102 | 10   | 55166711  | C            | T            | 0.26                   | 19.9                              | 15.6          | 11.8                     | 3.27E-06         |
| rs538811   | 11   | 30383651  | A            | G            | 0.06                   | 18.8                              | 11.8          | 0.0                      | 3.63E-06         |
| rs7085943  | 10   | 55166893  | G            | C            | 0.26                   | 20.0                              | 15.5          | 11.8                     | 3.67E-06         |
| rs17720273 | 2    | 2369626   | G            | C            | 0.12                   | 18.9                              | 13.7          | 9.5                      | 4.74E-06         |
| rs11004071 | 10   | 55538491  | G            | A            | 0.16                   | 19.3                              | 14.7          | 8.6                      | 4.83E-06         |
| rs12408952 | 1    | 155996652 | A            | G            | 0.34                   | 21.6                              | 15.9          | 12.1                     | 5.63E-06         |
| rs9381024  | 6    | 41092240  | C            | A            | 0.16                   | 19.3                              | 14.2          | 13.5                     | 6.25E-06         |
| rs9369260  | 6    | 41118346  | G            | C            | 0.16                   | 19.2                              | 14.1          | 14.4                     | 7.13E-06         |
| rs823994   | 5    | 132895169 | C            | G            | 0.05                   | 18.7                              | 9.8           | 4.8                      | 7.76E-06         |
| rs7933061  | 11   | 98519105  | A            | G            | 0.07                   | 18.6                              | 12.2          | 16.2                     | 8.06E-06         |
| rs1883595  | 6    | 41043706  | G            | A            | 0.17                   | 19.3                              | 14.3          | 14.4                     | 8.11E-06         |
| rs1940504  | 11   | 98518431  | A            | G            | 0.07                   | 18.5                              | 12.4          | 16.4                     | 8.27E-06         |
| rs1578774  | 10   | 55158280  | C            | T            | 0.24                   | 19.8                              | 15.6          | 10.8                     | 8.28E-06         |
| rs1940505  | 11   | 98518377  | G            | T            | 0.07                   | 18.6                              | 12.2          | 16.2                     | 8.74E-06         |
| rs1940503  | 11   | 98518522  | C            | T            | 0.07                   | 18.6                              | 12.3          | 16.4                     | 9.22E-06         |
| rs7105720  | 11   | 98518290  | G            | C            | 0.07                   | 18.6                              | 12.2          | 16.2                     | 9.46E-06         |

**Supplementary Table 3. Association of *PEAR1* Variant rs12041331 with Cardiovascular and Metabolic Traits in Participants of the Amish PAPI Study**

| Trait                    | GG          |        | GA            |       | AA          |        | Additive P-value |
|--------------------------|-------------|--------|---------------|-------|-------------|--------|------------------|
|                          | Homozygotes |        | Heterozygotes |       | Homozygotes |        |                  |
|                          | Mean        | SE     | Mean          | SE    | Mean        | SE     |                  |
| BMI                      | 26.953      | 0.218  | 27.912        | 0.480 | 27.600      | 1.926  | 0.002            |
| % Body Fat               | 27.839      | 0.466  | 27.074        | 1.032 | 23.226      | 6.647  | 0.047            |
| Triglyceride Levels      | 70.496      | 1.139  | 78.348        | 2.446 | 72.876      | 7.733  | 0.345            |
| Total Cholesterol        | 195.892     | 17.296 | 210.587       | 3.685 | 212.262     | 1.627  | 0.939            |
| HDL-Cholesterol          | 59.134      | 0.498  | 56.219        | 1.071 | 54.327      | 4.204  | 0.625            |
| LDL-Cholesterol          | 139.051     | 1.234  | 138.547       | 2.812 | 128.916     | 11.699 | 0.891            |
| Systolic Blood Pressure  | 117.343     | 0.346  | 118.006       | 0.668 | 118.041     | 4.531  | 0.877            |
| Diastolic Blood Pressure | 70.606      | 0.210  | 70.461        | 0.389 | 69.510      | 2.267  | 0.858            |
| Common Carotid IMT       | 0.639       | 0.006  | 0.635         | 0.013 | 0.573       | 0.079  | 0.946            |
| CRP Levels               | 1.948       | 0.033  | 2.182         | 0.074 | 2.168       | 0.399  | 0.741            |

**Supplementary Table 4. Baseline Characteristics\* for INVEST-GENES participants**

| Characteristics                   | Caucasians (n =570) |                  | African Americans (n=154) |                  | Hispanics (n=276) |                  |
|-----------------------------------|---------------------|------------------|---------------------------|------------------|-------------------|------------------|
|                                   | Cases (n=168)       | Controls (n=402) | Cases (n=40)              | Controls (n=114) | Cases (n=71)      | Controls (n=205) |
| Age, mean (SD), years             | 71.2 (9.5)          | 66.8 (9.6)       | 68.3 (11.2)               | 62.6 (9.1)       | 73.2 (8.9)        | 66.3 (9.6)       |
| Women                             | 73 (43.5)           | 158 (39.3)       | 24 (60.0)                 | 72 (63.2)        | 36 (50.7)         | 130 (63.4)       |
| Systolic BP, mean (SD), mmHg      | 150.8 (18.6)        | 150.0 (18.0)     | 156.1 (16.5)              | 152.4 (18.2)     | 146.8 (20.3)      | 146.8 (16.8)     |
| Diastolic BP, mean (SD), mmHg     | 81.7 (10.6)         | 84.4 (10.8)      | 90.1 (10.4)               | 91.3 (12.1)      | 83.6 (11.2)       | 86.9 (10.1)      |
| BMI, mean (SD), kg/m2             | 27.4 (5.0)          | 29.5 (5.8)       | 28.4 (4.6)                | 32.7 (7.2)       | 27.5 (4.3)        | 28.4 (4.5)       |
| rs12041331 minor allele frequency | 12.2                | 9.7              | 43.8                      | 42.5             | 19.7              | 22.2             |
| Myocardial infarction             | 64 (38.1)           | 176 (43.8)       | 16 (40.0)                 | 35 (30.7)        | 17 (23.9)         | 17 (8.3)         |
| Angina pectoris                   | 91 (54.2)           | 194 (48.3)       | 22 (55.0)                 | 92 (80.7)        | 57 (80.3)         | 191 (93.2)       |
| Revascularization >1 month ago    | 84 (50.0)           | 165 (41.0)       | 10 (25.0)                 | 23 (20.2)        | 11 (15.5)         | 9 (4.4)          |
| Stroke/TIA                        | 28 (16.7)           | 37 (9.2)         | 7 (17.5)                  | 7 (6.1)          | 7 (9.9)           | 6 (2.9)          |
| Left ventricular hypertrophy      | 24 (14.3)           | 45 (11.2)        | 14 (35.0)                 | 28 (24.6)        | 12 (16.9)         | 22 (10.7)        |
| Heart failure (class I–III)       | 19 (11.3)           | 13 (3.23)        | 5 (12.5)                  | 5 (4.4)          | 7 (9.9)           | 0 (0)            |
| Peripheral vascular disease       | 29 (17.3)           | 41 (10.2)        | 8 (20.0)                  | 7 (6.1)          | 15 (21.1)         | 10 (4.9)         |
| Smoking (ever)                    | 93 (55.4)           | 194 (48.3)       | 21 (52.5)                 | 43 (37.7)        | 31 (43.7)         | 61 (29.8)        |
| Diabetes <sup>†</sup>             | 49 (29.2)           | 79 (19.7)        | 23 (57.5)                 | 33 (28.9)        | 32 (45.1)         | 47 (22.9)        |
| Hypercholesterolemia              | 115 (68.5)          | 280 (69.7)       | 22 (55.0)                 | 45 (39.5)        | 34 (47.9)         | 79 (38.5)        |
| Renal impairment <sup>‡</sup>     | 13 (7.7)            | 8 (2.0)          | 1 (2.5)                   | 1 (0.9)          | 0 (0)             | 2 (1.0)          |
| Aspirin use                       | 119 (70.8)          | 242 (60.2)       | 25 (62.5)                 | 43 (37.7)        | 29 (40.8)         | 41 (20.0)        |
| Clopidogrel use                   | 0 (0.0)             | 0 (0.0)          | 0 (0.0)                   | 0 (0.0)          | 0 (0.0)           | 0 (0.0)          |
| Antidiabetic medication           | 42 (25.0)           | 72 (17.9)        | 20 (50.0)                 | 29 (25.4)        | 29 (40.8)         | 38 (18.5)        |
| Any lipid-lowering agent          | 82 (48.8)           | 208 (51.7)       | 10 (25.0)                 | 29 (25.4)        | 22 (31.0)         | 57 (27.8)        |
| Nitrates                          | 45 (26.8)           | 76 (18.9)        | 14 (35.0)                 | 29 (25.4)        | 34 (47.9)         | 47 (22.9)        |

Abbreviations: BP, blood pressure; BMI, body mass index; TIA, transient ischemic attack.

\*Values expressed as number (percentage) unless otherwise indicated. Percentages may not equal exactly 100 due to rounding.

<sup>†</sup>History of or currently taking antidiabetic or lipid-lowering medications.

<sup>‡</sup>History of or currently have elevated serum creatinine level but less than 4 mg/dl (< 354 mmol/l).



## SUPPLEMENTARY FIGURES

Baseline

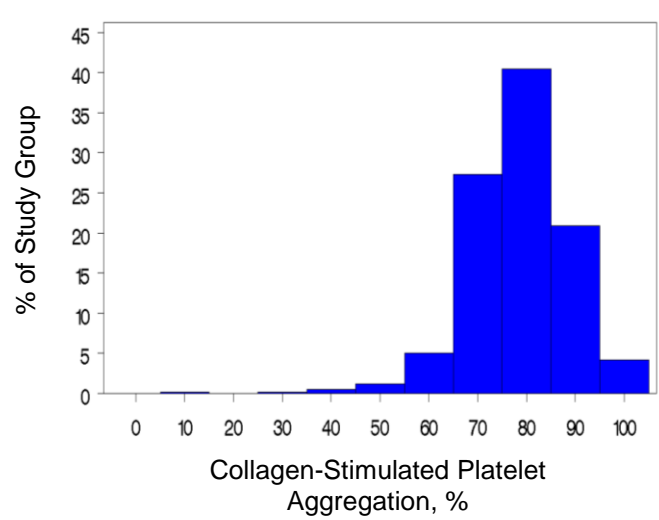

Post-Clopidogrel

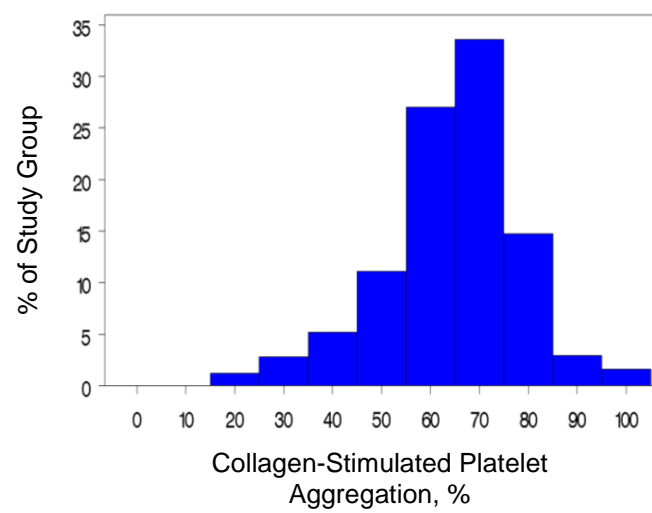

Post-Clopidogrel and Aspirin

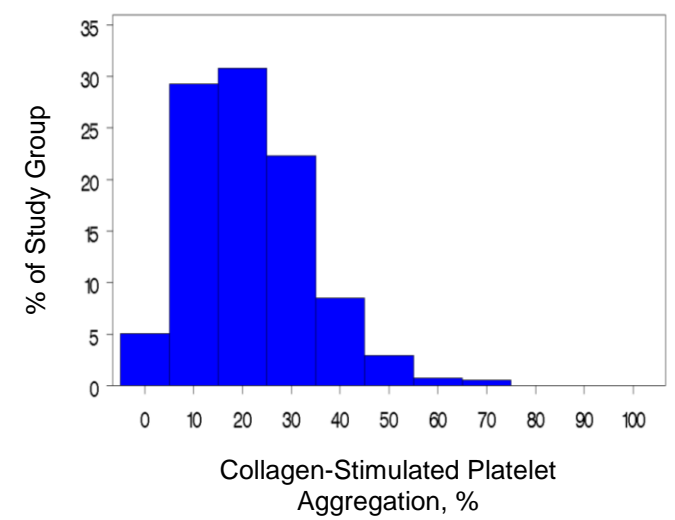

**PEAR1 rs12041331 A carriers vs. GG INVEST  
Primary Outcome in African Americans**

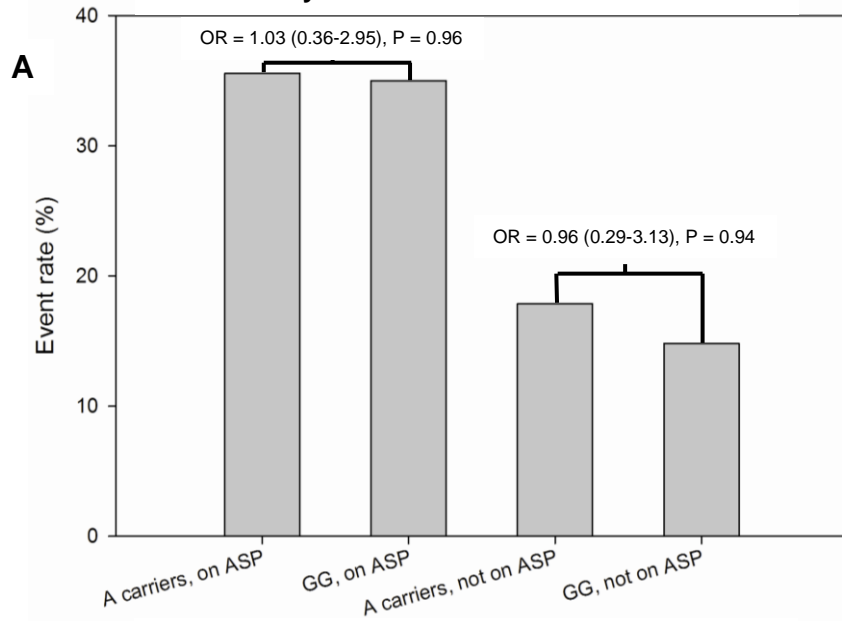

**PEAR1 rs12041331 A carriers vs. GG INVEST  
Primary Outcome in Hispanics**

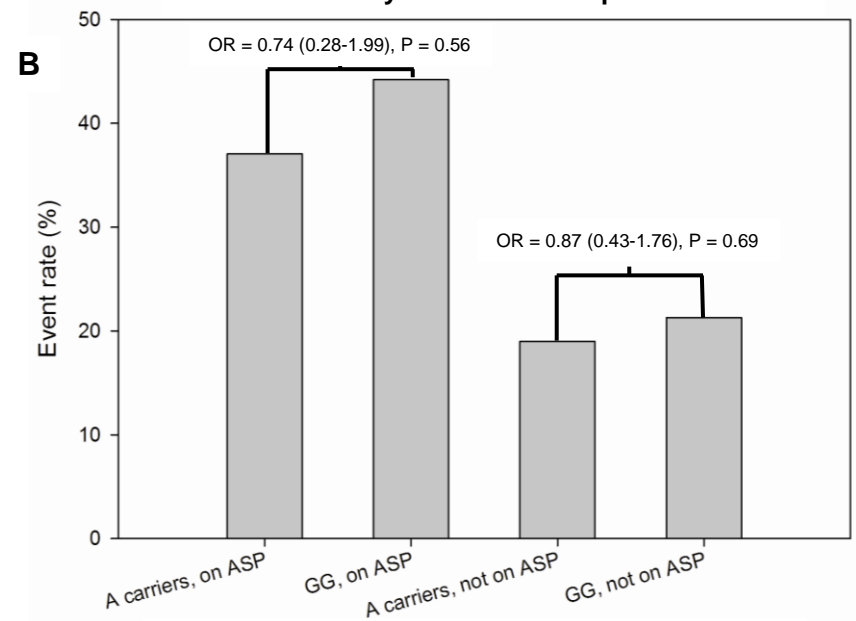

**PEAR1 rs12041331 A carriers vs. GG INVEST  
Fatal and Nonfatal MI in African Americans**

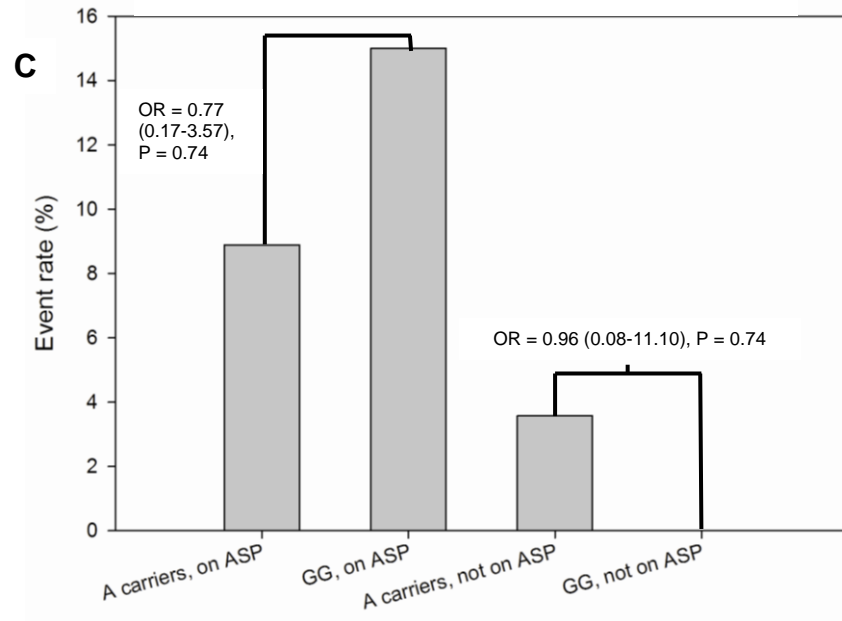

**PEAR1 rs12041331 A carriers vs. GG INVEST  
Fatal and Nonfatal MI in Hispanics**

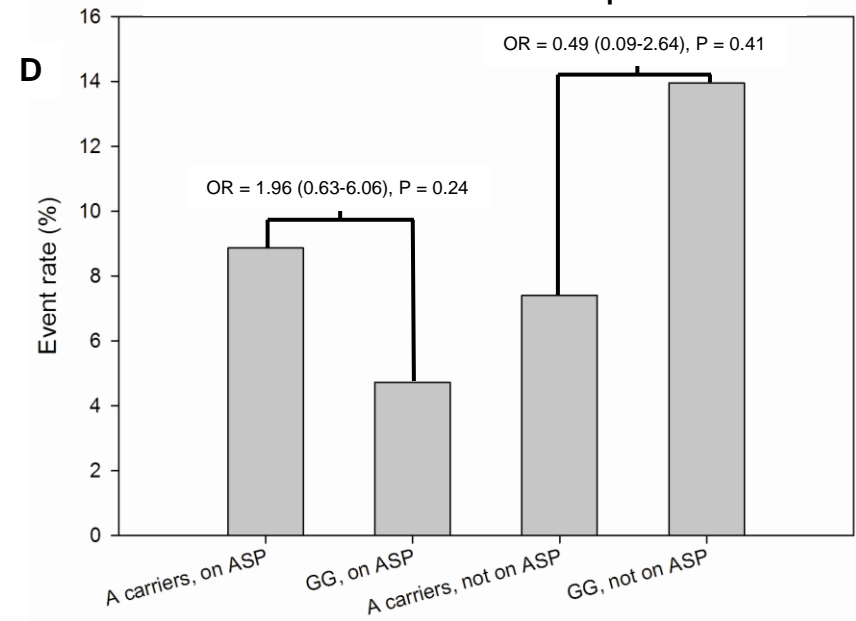

## **SUPPLEMENTAL FIGURE LEGENDS**

**Supplementary Figure 1. Distribution of collagen-stimulated platelet aggregation at baseline, after clopidogrel, and after clopidogrel and aspirin administration in 565 members of the Amish Pharmacogenomics of Antiplatelet Intervention (PAPI) Study.** Class intervals contain data greater than the lower limit and equal to the upper limit of each interval.

**Supplementary Figure 2. Association between *PEAR1* SNP rs12041331 A-allele carrier status and the primary outcome (A-B) or fatal and non-fatal myocardial infarction (C-D) in aspirin-treated and non-treated African American (A, C), and Hispanic (B, D) patients of INVEST-GENES.** All analyses were adjusted for age, sex, history of heart failure, and diabetes.

## SUPPLEMENTARY REFERENCES

1. A. R. Shuldiner, J. R. O'Connell, K. P. Bliden, A. Gandhi, K. Ryan, R. B. Horenstein, C. M. Damcott, R. Pakyz, U. S. Tantry, Q. Gibson, T. I. Pollin, W. Post, A. Parsa, B. D. Mitchell, N. Faraday, W. Herzog, P. A. Gurbel. Association of cytochrome P450 2C19 genotype with the antiplatelet effect and clinical efficacy of clopidogrel therapy. *JAMA* **302**:849-857 (2009)
2. P. A. Gurbel, K. P. Bliden, B. L. Hiatt, C. M. O'Connor. Clopidogrel for coronary stenting: response variability, drug resistance, and the effect of pretreatment platelet reactivity. *Circulation* **107**:2908-2913 (2003)
3. E. M. Antman, M. Hand, P. W. Armstrong, E. R. Bates, L. A. Green, L. K. Halasyamani, J. S. Hochman, H. M. Krumholz, G. A. Lamas, C. J. Mullany, D. L. Pearle, M. A. Sloan, S. C. Smith, Jr., D. T. Anbe, F. G. Kushner, J. P. Ornato, A. K. Jacobs, C. D. Adams, J. L. Anderson, C. E. Buller, M. A. Creager, S. M. Ettinger, J. L. Halperin, S. A. Hunt, B. W. Lytle, R. Nishimura, R. L. Page, B. Riegel, L. G. Tarkington, C. W. Yancy. 2007 Focused Update of the ACC/AHA 2004 Guidelines for the Management of Patients With ST-Elevation Myocardial Infarction: a report of the American College of Cardiology/American Heart Association Task Force on Practice Guidelines: developed in collaboration With the Canadian Cardiovascular Society endorsed by the American Academy of Family Physicians: 2007 Writing Group to Review New Evidence and Update the ACC/AHA 2004 Guidelines for the Management of Patients With ST-Elevation Myocardial Infarction, Writing on Behalf of the 2004 Writing Committee. *Circulation* **117**:296-329 (2008)

4. R. J. Applegate, M. T. Sacrinty, W. C. Little, R. M. Santos, S. K. Gandhi, M. A. Kutcher. Incidence of coronary stent thrombosis based on academic research consortium definitions. *Am J Cardiol* **102**:683-688 (2008)
5. A. L. Beitelshes, Y. Gong, D. Wang, N. J. Schork, R. M. Cooper-Dehoff, T. Y. Langae, M. D. Shriver, W. Sadee, H. J. Knot, C. J. Pepine, J. A. Johnson. KCNMB1 genotype influences response to verapamil SR and adverse outcomes in the INternational VERapamil SR/Trandolapril STudy (INVEST). *Pharmacogenet Genomics* **17**:719-729 (2007)
6. C. J. Pepine, E. M. Handberg, R. M. Cooper-DeHoff, R. G. Marks, P. Kowey, F. H. Messerli, G. Mancina, J. L. Cangiano, D. Garcia-Barreto, M. Keltai, S. Erdine, H. A. Bristol, H. R. Kolb, G. L. Bakris, J. D. Cohen, W. W. Parmley. A calcium antagonist vs a non-calcium antagonist hypertension treatment strategy for patients with coronary artery disease. The International Verapamil-Trandolapril Study (INVEST): a randomized controlled trial. *JAMA* **290**:2805-2816 (2003)
