# Supplementary material
Source: PubMed Central journal article supplement (PMC3715320)
Supplement: NIHMS455396-supplement-5.pdf [file NIHMS455396-supplement-5.pdf]

# Authorship Responsibility and Copyright Transfer Agreement

Each author must read and sign the statements in sections 1. (Authorship Responsibility, Criteria, and Contributions) and 3. (either Copyright Transfer or For U.S. Government Employee Authors). If needed, photocopy and distribute this document to coauthors.

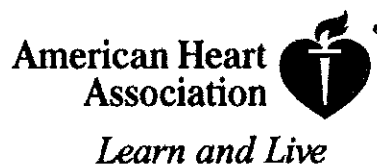

Journal Circulation: Cardiovascular Genetics Manuscript number CIRCV6/2012/964627R2 First author Lewis, Joshua

## 1. Authorship Responsibility, Criteria, and Contributions.

Each author should meet all criteria below (A, B, and C) and should indicate general and specific contributions by reading the criteria and checking the appropriate lines.

- A. I certify these three things:
- The manuscript represents valid work and neither it nor another one that that I have written with substantially similar content has been published or is being considered for publication elsewhere, except as described in an attachment.
  - If asked, I will provide or fully cooperate in obtaining and providing the data on which the manuscript is based so the editors or their assignees can examine it.
  - For papers with more than I author, I agree to allow the corresponding author to
    - be the main correspondent with the editorial office,
    - review the edited manuscript and proof, and
    - make decisions about releasing manuscript information to the media, federal agencies, or both.

If I am the only author, I will be the corresponding author and agree to handle these responsibilities.

- B. I have given final approval of the submitted manuscript.  
 Yes  No
- C. I have, or a coauthor has, had sufficient access to the data to verify the manuscript's scientific integrity.  
 Yes  No
- D. I have participated sufficiently in the manuscript to take public responsibility for (check only one)  
 part of the content  the whole content.
- E. To qualify for authorship, you must have made substantial contributions to the intellectual content of the paper. Please indicate your contribution(s) to this manuscript. Check all that apply.
- conceived and designed the research
  - acquired the data
  - analyzed and interpreted the data
  - performed statistical analysis
  - handled funding and supervision
  - drafted the manuscript
  - made critical revision of the manuscript for important intellectual content
  - other (specify) \_\_\_\_\_

## 2. Acknowledgment Section (for Corresponding Author Only).

Authors should obtain written permission from all individuals who are listed in the Acknowledgments section of the manuscript, because readers may infer their endorsement of

data and conclusions. The corresponding author must sign the following statement, certifying that (1) all persons who have made substantial contributions in the manuscript (eg, data collection, analysis, or writing or editing assistance), but who do not fulfill authorship criteria, are named with their specific contributions in the Acknowledgments section of the manuscript; (2) all persons named in the Acknowledgments section have provided the corresponding author with written permission to be named in the manuscript; and (3) if an Acknowledgments section is not included, no other persons have made substantial contributions to this manuscript.

Corresponding Author's Signature: \_\_\_\_\_

## 3. Copyright Transfer Agreement.

The American Heart Association, Inc. (AHA), a New York not-for-profit corporation, located at 7272 Greenville Avenue, Dallas, Texas 75231, and the Author hereby agree:

In consideration of the AHA reviewing and editing the Work described below for first and exclusive publication,

Journal Circulation: Cardiovascular Genetics  
Manuscript number CIRCV6/2012/964627R2  
First author Joshua Lewis  
Title of Work Genetic Variation in PEAR1 is associated with Platelet aggregation and Cardiovascular Outcomes

The author who signs below hereby assigns, conveys, and otherwise transfers all rights, title, interest, and copyright ownership in this Work to the AHA when the AHA accepts it for publication.

- "Work" means the material submitted for publication plus any other related material submitted to the AHA.
- The rights assigned to the AHA include (but are not limited to) the rights to
  - edit, publish, reproduce, distribute copies, prepare derivative works, include in indexes or search databases in print, electronic, or other media, (whether or not they are used when this agreement is executed), and
  - claim copyright in this Work throughout the world for as long as it is copyrighted, including renewals or extensions.

All accepted Works become the AHA's property and may not be published elsewhere without the AHA's prior written permission.

- Authors may use parts of the Work (eg, tables, figures) in subsequent works without asking the AHA's permission.

For Works created under grant and accepted for publication in an AHA journal, the author may cause the Accepted Version of the Work to be posted on the Web archive of a body that funded all or part of the Work, and/or an author's institutional repository, provided that this post appears no sooner than 6 months after the AHA publishes the Work in a journal and that

## Authorship Responsibility and Copyright Transfer Agreement

Each author must read and sign the statements in sections 1. (Authorship Responsibility, Criteria, and Contributions) and 3. (either Copyright Transfer or For U.S. Government Employee Authors). If needed, photocopy and distribute this document to coauthors.

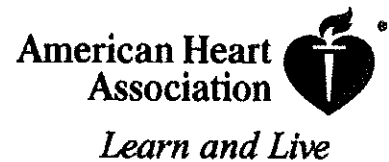

Journal Circulation Cardiovascular Genetics Manuscript number CIRCCVGF/2012/764627R2 First author Lewis, Joshua

the archive is publicly and noncommercially available via the World Wide Web.

- The "Accepted Version" means the paper includes peer review changes but not AHA's copyediting and production changes.
- "No sooner than 6 months after the AHA publishes the Work" means at least 6 months after the first appearance of the Work either on the AHA journal's Web site as a publish-ahead-of-print article or on the AHA journal's Web site published as part of a regular issue.

### Public Access Policy Funding Disclosure:

Please disclose below if the author has received funding for research on which the article is based from any of the following organizations:

- National Institutes of Health (NIH)
- Wellcome Trust
- Howard Hughes Medical Institute (HHMI)
- Other (please list) \_\_\_\_\_

Authors hereby represent and warrant that

- they are the sole authors of the Work,
- all authors have participated in and agree with the content and Work's conclusions,
- the Work is original and does not infringe upon any copyright, proprietary, or personal right of any third party, and
- no part of it nor any Work based on substantially similar data has been submitted to another journal for publication.

If the AHA does not publish this Work, the authors will be notified and all rights given to the AHA will revert to them. If this is a joint Work, all coauthors must transfer rights in this Work to the AHA by executing this Agreement. This Agreement must be executed as is without revision or substitution of terms. The author's original, handwritten signature is required. This Agreement is governed by the laws of the United States.

Author's Printed Name: Joshua P. Lewis

Signature: Joshua P. Lewis

Date Signed: 11/7/13

### For U.S. Government Employee Authors:

The person signing below hereby warrants that the Work described above was written by United States Government employees as part of their official duties and so may be published and reproduced without restriction. (All nongovernment employee authors or coauthors must sign the prior portion of this agreement transferring copyright.)

Author's Printed Name: \_\_\_\_\_

Signature: \_\_\_\_\_

Date Signed: \_\_\_\_\_

## Authorship Responsibility and Copyright Transfer Agreement

Each author must read and sign the statements in sections 1. (Authorship Responsibility, Criteria, and Contributions) and 3. (either Copyright Transfer or For U.S. Government Employee Authors). If needed, photocopy and distribute this document to coauthors.

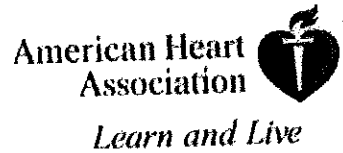

Journal Circulation: Cardiovascular Genetics Manuscript number CIRCCVG/2012/964627 R2 First author Joshua P Lewis

### 1. Authorship Responsibility, Criteria, and Contributions.

Each author should meet all criteria below (A, B, and C) and should indicate general and specific contributions by reading the criteria and checking the appropriate lines.

- A. I certify these three things:
- The manuscript represents valid work and neither it nor another one that that I have written with substantially similar content has been published or is being considered for publication elsewhere, except as described in an attachment.
  - If asked, I will provide or fully cooperate in obtaining and providing the data on which the manuscript is based so the editors or their assignees can examine it.
  - For papers with more than 1 author, I agree to allow the corresponding author to
    - be the main correspondent with the editorial office.
    - review the edited manuscript and proof, and
    - make decisions about releasing manuscript information to the media, federal agencies, or both.
- If I am the only author, I will be the corresponding author and agree to handle these responsibilities.

B. I have given final approval of the submitted manuscript.

Yes  No

C. I have, or a coauthor has, had sufficient access to the data to verify the manuscript's scientific integrity.

Yes  No

D. I have participated sufficiently in the manuscript to take public responsibility for (check only one)

part of the content  the whole content.

E. To qualify for authorship, you must have made substantial contributions to the intellectual content of the paper. Please indicate your contribution(s) to this manuscript. Check all that apply.

- conceived and designed the research
- acquired the data
- analyzed and interpreted the data
- performed statistical analysis
- handled funding and supervision
- drafted the manuscript
- made critical revision of the manuscript for important intellectual content
- other (specify) \_\_\_\_\_

### 2. Acknowledgment Section (for Corresponding Author Only).

Authors should obtain written permission from all individuals who are listed in the Acknowledgments section of the manuscript, because readers may infer their endorsement of

data and conclusions. The corresponding author must sign the following statement, certifying that (1) all persons who have made substantial contributions in the manuscript (eg, data collection, analysis, or writing or editing assistance), but who do not fulfill authorship criteria, are named with their specific contributions in the Acknowledgments section of the manuscript; (2) all persons named in the Acknowledgments section have provided the corresponding author with written permission to be named in the manuscript; and (3) if an Acknowledgments section is not included, no other persons have made substantial contributions to this manuscript.

Corresponding Author's Signature: \_\_\_\_\_

### 3. Copyright Transfer Agreement.

The American Heart Association, Inc. (AHA), a New York not-for-profit corporation, located at 7272 Greenville Avenue, Dallas, Texas 75231, and the Author hereby agree:

In consideration of the AHA reviewing and editing the Work described below for first and exclusive publication,

Journal Circulation: Cardiovascular Genetics  
 Manuscript number CIRCCVG/2012/964627 R2  
 First author Joshua P Lewis  
 Title of Work Genetic Variation in PEARI is Associated with Platelet Aggregation and Cardiovascular Outcomes

The author who signs below hereby assigns, conveys, and otherwise transfers all rights, title, interest, and copyright ownership in this Work to the AHA when the AHA accepts it for publication.

- "Work" means the material submitted for publication plus any other related material submitted to the AHA.
- The rights assigned to the AHA include (but are not limited to) the rights to
  - edit, publish, reproduce, distribute copies, prepare derivative works, include in indexes or search databases in print, electronic, or other media, (whether or not they are used when this agreement is executed), and
  - claim copyright in this Work throughout the world for as long as it is copyrighted, including renewals or extensions.

All accepted Works become the AHA's property and may not be published elsewhere without the AHA's prior written permission.

- Authors may use parts of the Work (eg, tables, figures) in subsequent works without asking the AHA's permission.

For Works created under grant and accepted for publication in an AHA journal, the author may cause the Accepted Version of the Work to be posted on the Web archive of a body that funded all or part of the Work, and/or an author's institutional repository, provided that this post appears no sooner than 6 months after the AHA publishes the Work in a journal and that

## Authorship Responsibility and Copyright Transfer Agreement

Each author must read and sign the statements in sections 1. (Authorship Responsibility, Criteria, and Contributions) and 3. (either Copyright Transfer or For U.S. Government Employee Authors). If needed, photocopy and distribute this document to coauthors.

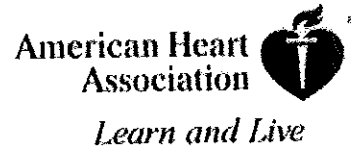

Journal Circulation: Cardiovascular Genetics Manuscript number CIRCCVG/2012/964627 R2 First author Joshua P Lewis

the archive is publicly and noncommercially available via the World Wide Web.

- The "Accepted Version" means the paper includes peer review changes but not AHA's copyediting and production changes.
- "No sooner than 6 months after the AHA publishes the Work" means at least 6 months after the first appearance of the Work either on the AHA journal's Web site as a publish-ahead-of-print article or on the AHA journal's Web site published as part of a regular issue.

### Public Access Policy Funding Disclosure:

Please disclose below if the author has received funding for research on which the article is based from any of the following organizations:

- National Institutes of Health (NIH)
- Wellcome Trust
- Howard Hughes Medical Institute (HHMI)
- Other (please list) \_\_\_\_\_

Authors hereby represent and warrant that

- they are the sole authors of the Work,
- all authors have participated in and agree with the content and Work's conclusions.
- the Work is original and does not infringe upon any copyright, proprietary, or personal right of any third party, and
- no part of it nor any Work based on substantially similar data has been submitted to another journal for publication.

If the AHA does not publish this Work, the authors will be notified and all rights given to the AHA will revert to them. If this is a joint Work, all coauthors must transfer rights in this Work to the AHA by executing this Agreement. This Agreement must be executed as is without revision or substitution of terms. The author's original, handwritten signature is required. This Agreement is governed by the laws of the United States.

Author's Printed Name: Kathleen Ryan  
Signature: [Handwritten Signature]  
Date Signed: 1-7-13

### For U.S. Government Employee Authors:

The person signing below hereby warrants that the Work described above was written by United States Government employees as part of their official duties and so may be published and reproduced without restriction. (All nongovernment employee authors or coauthors must sign the prior portion of this agreement transferring copyright.)

Author's Printed Name: \_\_\_\_\_

Signature: \_\_\_\_\_

Date Signed: \_\_\_\_\_

# Authorship Responsibility and Copyright Transfer Agreement

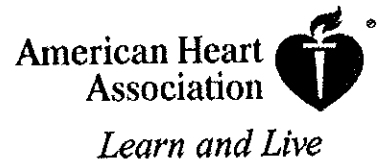

Each author must read and sign the statements in sections 1. (Authorship Responsibility, Criteria, and Contributions) and 3. (either Copyright Transfer or For U.S. Government Employee Authors). If needed, photocopy and distribute this document to coauthors.

Journal Circulation: Cardiovascular Genetics Manuscript number CIRCCVG/2012/964627 R2 First author Joshua P Lewis

## 1. Authorship Responsibility, Criteria, and Contributions.

Each author should meet all criteria below (A, B, and C) and should indicate general and specific contributions by reading the criteria and checking the appropriate lines.

- A. I certify these three things:
- The manuscript represents valid work and neither it nor another one that I have written with substantially similar content has been published or is being considered for publication elsewhere, except as described in an attachment.
  - If asked, I will provide or fully cooperate in obtaining and providing the data on which the manuscript is based so the editors or their assignees can examine it.
  - For papers with more than 1 author, I agree to allow the corresponding author to
    - be the main correspondent with the editorial office,
    - review the edited manuscript and proof, and
    - make decisions about releasing manuscript information to the media, federal agencies, or both.

If I am the only author, I will be the corresponding author and agree to handle these responsibilities.

- B. I have given final approval of the submitted manuscript.  
 Yes  No
- C. I have, or a coauthor has, had sufficient access to the data to verify the manuscript's scientific integrity.  
 Yes  No
- D. I have participated sufficiently in the manuscript to take public responsibility for (check only one)  
 part of the content  the whole content.
- E. To qualify for authorship, you must have made substantial contributions to the intellectual content of the paper. Please indicate your contribution(s) to this manuscript. Check all that apply.
- conceived and designed the research
  - acquired the data
  - analyzed and interpreted the data
  - performed statistical analysis
  - handled funding and supervision
  - drafted the manuscript
  - made critical revision of the manuscript for important intellectual content
  - other (specify) \_\_\_\_\_

## 2. Acknowledgment Section (for Corresponding Author Only).

Authors should obtain written permission from all individuals who are listed in the Acknowledgments section of the manuscript, because readers may infer their endorsement of

data and conclusions. The corresponding author must sign the following statement, certifying that (1) all persons who have made substantial contributions in the manuscript (eg, data collection, analysis, or writing or editing assistance), but who do not fulfill authorship criteria, are named with their specific contributions in the Acknowledgments section of the manuscript; (2) all persons named in the Acknowledgments section have provided the corresponding author with written permission to be named in the manuscript; and (3) if an Acknowledgments section is not included, no other persons have made substantial contributions to this manuscript.

Corresponding Author's Signature: \_\_\_\_\_

## 3. Copyright Transfer Agreement.

The American Heart Association, Inc. (AHA), a New York not-for-profit corporation, located at 7272 Greenville Avenue, Dallas, Texas 75231, and the Author hereby agree:

In consideration of the AHA reviewing and editing the Work described below for first and exclusive publication,

Journal Circulation: Cardiovascular Genetics  
Manuscript number CIRCCVG/2012/964627 R2  
First author Joshua P Lewis  
Title of Work Genetic Variation In PEAR1 is  
Associated with Platelet Aggregation and Cardiovascular Outcomes

The author who signs below hereby assigns, conveys, and otherwise transfers all rights, title, interest, and copyright ownership in this Work to the AHA when the AHA accepts it for publication.

- "Work" means the material submitted for publication plus any other related material submitted to the AHA.
- The rights assigned to the AHA include (but are not limited to) the rights to
  - edit, publish, reproduce, distribute copies, prepare derivative works, include in indexes or search databases in print, electronic, or other media, (whether or not they are used when this agreement is executed), and
  - claim copyright in this Work throughout the world for as long as it is copyrighted, including renewals or extensions.

All accepted Works become the AHA's property and may not be published elsewhere without the AHA's prior written permission.

- Authors may use parts of the Work (eg, tables, figures) in subsequent works without asking the AHA's permission.

For Works created under grant and accepted for publication in an AHA journal, the author may cause the Accepted Version of the Work to be posted on the Web archive of a body that funded all or part of the Work, and/or an author's institutional repository, provided that this post appears no sooner than 6 months after the AHA publishes the Work in a journal and that

## Authorship Responsibility and Copyright Transfer Agreement

Each author must read and sign the statements in sections 1. (Authorship Responsibility, Criteria, and Contributions) and 3. (either Copyright Transfer or For U.S. Government Employee Authors). If needed, photocopy and distribute this document to coauthors.

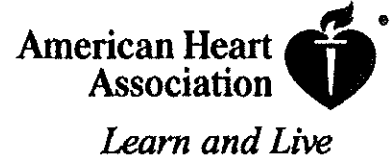

Journal Circulation Cardiovascular Quality & Outcomes Manuscript number CRCVQ/2013/004627R2 First author Joshua D. Lewis

the archive is publicly and noncommercially available via the World Wide Web.

- The "Accepted Version" means the paper includes peer review changes but not AHA's copyediting and production changes.
- "No sooner than 6 months after the AHA publishes the Work" means at least 6 months after the first appearance of the Work either on the AHA journal's Web site as a publish-ahead-of-print article or on the AHA journal's Web site published as part of a regular issue.

### Public Access Policy Funding Disclosure:

Please disclose below if the author has received funding for research on which the article is based from any of the following organizations:

- National Institutes of Health (NIH)
- Wellcome Trust
- Howard Hughes Medical Institute (HHMI)
- Other (please list) \_\_\_\_\_

### For U.S. Government Employee Authors:

The person signing below hereby warrants that the Work described above was written by United States Government employees as part of their official duties and so may be published and reproduced without restriction. (All nongovernment employee authors or coauthors must sign the prior portion of this agreement transferring copyright.)

Author's Printed Name: \_\_\_\_\_

Signature: \_\_\_\_\_

Date Signed: \_\_\_\_\_

Authors hereby represent and warrant that

- they are the sole authors of the Work,
- all authors have participated in and agree with the content and Work's conclusions,
- the Work is original and does not infringe upon any copyright, proprietary, or personal right of any third party, and
- no part of it nor any Work based on substantially similar data has been submitted to another journal for publication.

If the AHA does not publish this Work, the authors will be notified and all rights given to the AHA will revert to them. If this is a joint Work, all coauthors must transfer rights in this Work to the AHA by executing this Agreement. This Agreement must be executed as is without revision or substitution of terms. The author's original, handwritten signature is required. This Agreement is governed by the laws of the United States.

Author's Printed Name: JEFFREY R O'CONNELL

Signature: Jeffrey R O'Connell

Date Signed: 1/22/13

### Authorship Responsibility and Copyright Transfer Agreement

Each author must read and sign the statements in sections 1. (Authorship Responsibility, Criteria, and Contributions) and 3. (either Copyright Transfer or For U.S. Government Employee Authors). If needed, photocopy and distribute this document to coauthors.

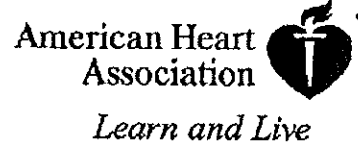

Journal Circ Cardiovascul Genet Manuscript number CIRC CVG 2012 964627 R2

First author JOSHUA P LEWIS

#### 1. Authorship Responsibility, Criteria, and Contributions.

Each author should meet all criteria below (A, B, and C) and should indicate general and specific contributions by reading the criteria and checking the appropriate lines.

- A. I certify these three things:
    - The manuscript represents valid work and neither it nor another one that that I have written with substantially similar content has been published or is being considered for publication elsewhere, except as described in an attachment.
    - If asked, I will provide or fully cooperate in obtaining and providing the data on which the manuscript is based so the editors or their assignees can examine it.
    - For papers with more than 1 author, I agree to allow the corresponding author to
      - be the main correspondent with the editorial office,
      - review the edited manuscript and proof, and
      - make decisions about releasing manuscript information to the media, federal agencies, or both.
- If I am the only author, I will be the corresponding author and agree to handle these responsibilities.

- B. I have given final approval of the submitted manuscript.
  - Yes  No
- C. I have, or a coauthor has, had sufficient access to the data to verify the manuscript's scientific integrity.
  - Yes  No
- D. I have participated sufficiently in the manuscript to take public responsibility for (check only one)
  - part of the content  the whole content.

- E. To qualify for authorship, you must have made substantial contributions to the intellectual content of the paper. Please indicate your contribution(s) to this manuscript. Check all that apply.
  - conceived and designed the research
  - acquired the data
  - analyzed and interpreted the data
  - performed statistical analysis
  - handled funding and supervision
  - drafted the manuscript
  - made critical revision of the manuscript for important intellectual content
  - other (specify) \_\_\_\_\_

#### 2. Acknowledgment Section (for Corresponding Author Only).

Authors should obtain written permission from all individuals who are listed in the Acknowledgments section of the manuscript, because readers may infer their endorsement of

data and conclusions. The corresponding author must sign the following statement, certifying that (1) all persons who have made substantial contributions in the manuscript (eg, data collection, analysis, or writing or editing assistance), but who do not fulfill authorship criteria, are named with their specific contributions in the Acknowledgments section of the manuscript; (2) all persons named in the Acknowledgments section have provided the corresponding author with written permission to be named in the manuscript; and (3) if an Acknowledgments section is not included, no other persons have made substantial contributions to this manuscript.

Corresponding Author's Signature: \_\_\_\_\_

#### 3. Copyright Transfer Agreement.

The American Heart Association, Inc. (AHA), a New York not-for-profit corporation, located at 7272 Greenville Avenue, Dallas, Texas 75231, and the Author hereby agree:

In consideration of the AHA reviewing and editing the Work described below for first and exclusive publication,

Journal Circ Cardiovascular Genet  
 Manuscript number CIRC CVG 2012 964627 R2  
 First author JOSHUA P LEWIS  
 Title of Work GENETIC VARIATION IN PEAR1 IS ASSOCIATED WITH PLATELET AGGREGATION AND CARDIOVASCULAR OUTCOMES

The author who signs below hereby assigns, conveys, and otherwise transfers all rights, title, interest, and copyright ownership in this Work to the AHA when the AHA accepts it for publication.

- "Work" means the material submitted for publication plus any other related material submitted to the AHA.
- The rights assigned to the AHA include (but are not limited to) the rights to
  - edit, publish, reproduce, distribute copies, prepare derivative works, include in indexes or search databases in print, electronic, or other media, (whether or not they are used when this agreement is executed), and
  - claim copyright in this Work throughout the world for as long as it is copyrighted, including renewals or extensions.

All accepted Works become the AHA's property and may not be published elsewhere without the AHA's prior written permission.

- Authors may use parts of the Work (eg, tables, figures) in subsequent works without asking the AHA's permission.

For Works created under grant and accepted for publication in an AHA journal, the author may cause the Accepted Version of the Work to be posted on the Web archive of a body that funded all or part of the Work, and/or an author's institutional repository, provided that this post appears no sooner than 6 months after the AHA publishes the Work in a journal and that

### Authorship Responsibility and Copyright Transfer Agreement

Each author must read and sign the statements in sections 1. (Authorship Responsibility, Criteria, and Contributions) and 3. (either Copyright Transfer or For U.S. Government Employee Authors). If needed, photocopy and distribute this document to coauthors.

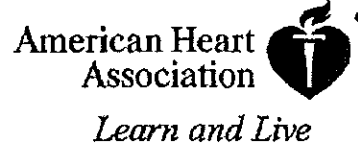

Journal Circ: CARDIOVASCULAR GENETICS Manuscript number Circ CVG 2013-196462710 First author Joshua P LEWIS

the archive is publicly and noncommercially available via the World Wide Web.

- The "Accepted Version" means the paper includes peer review changes but not AHA's copyediting and production changes.
- "No sooner than 6 months after the AHA publishes the Work" means at least 6 months after the first appearance of the Work either on the AHA journal's Web site as a publish-ahead-of-print article or on the AHA journal's Web site published as part of a regular issue.

#### Public Access Policy Funding Disclosure:

Please disclose below if the author has received funding for research on which the article is based from any of the following organizations:

- National Institutes of Health (NIH)
- Wellcome Trust
- Howard Hughes Medical Institute (HHMI)
- Other (please list) \_\_\_\_\_

#### For U.S. Government Employee Authors:

The person signing below hereby warrants that the Work described above was written by United States Government employees as part of their official duties and so may be published and reproduced without restriction. (All nongovernment employee authors or coauthors must sign the prior portion of this agreement transferring copyright.)

Author's Printed Name: \_\_\_\_\_

Signature: \_\_\_\_\_

Date Signed: \_\_\_\_\_

Authors hereby represent and warrant that

- they are the sole authors of the Work,
- all authors have participated in and agree with the content and Work's conclusions,
- the Work is original and does not infringe upon any copyright, proprietary, or personal right of any third party, and
- no part of it nor any Work based on substantially similar data has been submitted to another journal for publication.

If the AHA does not publish this Work, the authors will be notified and all rights given to the AHA will revert to them. If this is a joint Work, all coauthors must transfer rights in this Work to the AHA by executing this Agreement. This Agreement must be executed as is without revision or substitution of terms. The author's original, handwritten signature is required. This Agreement is governed by the laws of the United States.

Author's Printed Name: Richard B. HURENSTEIN

Signature: [Handwritten Signature]

Date Signed: Jan 11, 2013



# Authorship Responsibility and Copyright Transfer Agreement

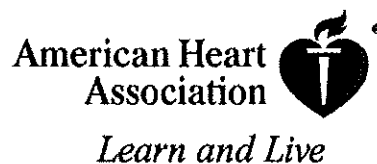

Each author must read and sign the statements in sections 1. (Authorship Responsibility, Criteria, and Contributions) and 3. (either Copyright Transfer or For U.S. Government Employee Authors). If needed, photocopy and distribute this document to coauthors.

Journal Circulation: Cardiovascular Genetics Manuscript number CIRCCVG/2012/964627 First author Joshua P Lewis  
RA

## 1. Authorship Responsibility, Criteria, and Contributions.

Each author should meet all criteria below (A, B, and C) and should indicate general and specific contributions by reading the criteria and checking the appropriate lines.

- A. I certify these three things:
- The manuscript represents valid work and neither it nor another one that I have written with substantially similar content has been published or is being considered for publication elsewhere, except as described in an attachment.
  - If asked, I will provide or fully cooperate in obtaining and providing the data on which the manuscript is based so the editors or their assignees can examine it.
  - For papers with more than 1 author, I agree to allow the corresponding author to
    - be the main correspondent with the editorial office,
    - review the edited manuscript and proof, and
    - make decisions about releasing manuscript information to the media, federal agencies, or both.

If I am the only author, I will be the corresponding author and agree to handle these responsibilities.

- B. I have given final approval of the submitted manuscript.  
 Yes  No
- C. I have, or a coauthor has, had sufficient access to the data to verify the manuscript's scientific integrity.  
 Yes  No
- D. I have participated sufficiently in the manuscript to take public responsibility for (check only one)  
 part of the content  the whole content.
- E. To qualify for authorship, you must have made substantial contributions to the intellectual content of the paper. Please indicate your contribution(s) to this manuscript. Check all that apply.
- conceived and designed the research
  - acquired the data
  - analyzed and interpreted the data
  - performed statistical analysis
  - handled funding and supervision
  - drafted the manuscript
  - made critical revision of the manuscript for important intellectual content
  - other (specify) assisted in manuscript prep

## 2. Acknowledgment Section (for Corresponding Author Only).

Authors should obtain written permission from all individuals who are listed in the Acknowledgments section of the manuscript, because readers may infer their endorsement of

data and conclusions. The corresponding author must sign the following statement, certifying that (1) all persons who have made substantial contributions in the manuscript (eg, data collection, analysis, or writing or editing assistance), but who do not fulfill authorship criteria, are named with their specific contributions in the Acknowledgments section of the manuscript; (2) all persons named in the Acknowledgments section have provided the corresponding author with written permission to be named in the manuscript; and (3) if an Acknowledgments section is not included, no other persons have made substantial contributions to this manuscript.

Corresponding Author's Signature: \_\_\_\_\_

## 3. Copyright Transfer Agreement.

The American Heart Association, Inc. (AHA), a New York not-for-profit corporation, located at 7272 Greenville Avenue, Dallas, Texas 75231, and the Author hereby agree:

In consideration of the AHA reviewing and editing the Work described below for first and exclusive publication,

Journal Circulation: Cardiovascular Genetics  
 Manuscript number CIRCCVG/2012/964627 RA  
 First author Joshua P. Lewis  
 Title of Work Genetic Variation in PEAR1 is Associated with Platelet Aggregation and Cardiovascular Outcomes

The author who signs below hereby assigns, conveys, and otherwise transfers all rights, title, interest, and copyright ownership in this Work to the AHA when the AHA accepts it for publication.

- "Work" means the material submitted for publication plus any other related material submitted to the AHA.
- The rights assigned to the AHA include (but are not limited to) the rights to
  - edit, publish, reproduce, distribute copies, prepare derivative works, include in indexes or search databases in print, electronic, or other media, (whether or not they are used when this agreement is executed), and
  - claim copyright in this Work throughout the world for as long as it is copyrighted, including renewals or extensions.

All accepted Works become the AHA's property and may not be published elsewhere without the AHA's prior written permission.

- Authors may use parts of the Work (eg, tables, figures) in subsequent works without asking the AHA's permission.

For Works created under grant and accepted for publication in an AHA journal, the author may cause the Accepted Version of the Work to be posted on the Web archive of a body that funded all or part of the Work, and/or an author's institutional repository, provided that this post appears no sooner than 6 months after the AHA publishes the Work in a journal and that

## Authorship Responsibility and Copyright Transfer Agreement

Each author must read and sign the statements in sections 1. (Authorship Responsibility, Criteria, and Contributions) and 3. (either Copyright Transfer or For U.S. Government Employee Authors). If needed, photocopy and distribute this document to coauthors.

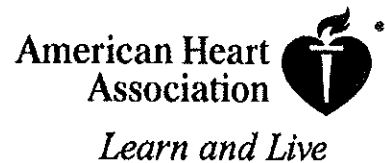

Journal Circulation Cardiovascular Quality and Outcomes Manuscript number CIRCOUTS/2012/164627A First author Joshua Lee

the archive is publicly and noncommercially available via the World Wide Web.

- The "Accepted Version" means the paper includes peer review changes but not AHA's copyediting and production changes.
- "No sooner than 6 months after the AHA publishes the Work" means at least 6 months after the first appearance of the Work either on the AHA journal's Web site as a publish-ahead-of-print article or on the AHA journal's Web site published as part of a regular issue.

### Public Access Policy Funding Disclosure:

Please disclose below if the author has received funding for research on which the article is based from any of the following organizations:

- National Institutes of Health (NIH)  
 Wellcome Trust  
 Howard Hughes Medical Institute (HHMI)  
 Other (please list) \_\_\_\_\_  
\_\_\_\_\_  
\_\_\_\_\_

Authors hereby represent and warrant that

- they are the sole authors of the Work,
- all authors have participated in and agree with the content and Work's conclusions,
- the Work is original and does not infringe upon any copyright, proprietary, or personal right of any third party, and
- no part of it nor any Work based on substantially similar data has been submitted to another journal for publication.

If the AHA does not publish this Work, the authors will be notified and all rights given to the AHA will revert to them. If this is a joint Work, all coauthors must transfer rights in this Work to the AHA by executing this Agreement. This Agreement must be executed as is without revision or substitution of terms. The author's original, handwritten signature is required. This Agreement is governed by the laws of the United States.

Author's Printed Name: Coleen M. Damcott

Signature: Coleen M. Damcott

Date Signed: 1/7/13

### For U.S. Government Employee Authors:

The person signing below hereby warrants that the Work described above was written by United States Government employees as part of their official duties and so may be published and reproduced without restriction. (All nongovernment employee authors or coauthors must sign the prior portion of this agreement transferring copyright.)

Author's Printed Name: \_\_\_\_\_

Signature: \_\_\_\_\_

Date Signed: \_\_\_\_\_

# Authorship Responsibility and Copyright Transfer Agreement

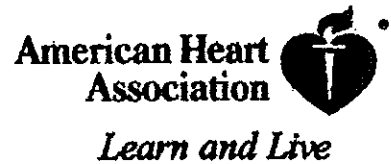

Each author must read and sign the statements in sections 1. (Authorship Responsibility, Criteria, and Contributions) and 3. (either Copyright Transfer or For U.S. Government Employee Authors). If needed, photocopy and distribute this document to coauthors.

Journal Circulation Cardiovascular Genetics Manuscript number 202/964627 R2 First author Joshua Lewis

## 1. Authorship Responsibility, Criteria, and Contributions.

Each author should meet all criteria below (A, B, and C) and should indicate general and specific contributions by reading the criteria and checking the appropriate lines.

- A.** I certify these three things:
- The manuscript represents valid work and neither it nor another one that that I have written with substantially similar content has been published or is being considered for publication elsewhere, except as described in an attachment.
  - If asked, I will provide or fully cooperate in obtaining and providing the data on which the manuscript is based so the editors or their assignees can examine it.
  - For papers with more than 1 author, I agree to allow the corresponding author to
    - be the main correspondent with the editorial office,
    - review the edited manuscript and proof, and
    - make decisions about releasing manuscript information to the media, federal agencies, or both.
- If I am the only author, I will be the corresponding author and agree to handle these responsibilities.
- B.** I have given final approval of the submitted manuscript.  
 Yes  No
- C.** I have, or a coauthor has, had sufficient access to the data to verify the manuscript's scientific integrity.  
 Yes  No
- D.** I have participated sufficiently in the manuscript to take public responsibility for (check only one)  
 part of the content  the whole content.
- E.** To qualify for authorship, you must have made substantial contributions to the intellectual content of the paper. Please indicate your contribution(s) to this manuscript. Check all that apply.
- conceived and designed the research
  - acquired the data
  - analyzed and interpreted the data
  - performed statistical analysis
  - handled funding and supervision
  - drafted the manuscript
  - made critical revision of the manuscript for important intellectual content
  - other (specify) \_\_\_\_\_

data and conclusions. The corresponding author must sign the following statement, certifying that (1) all persons who have made substantial contributions in the manuscript (eg, data collection, analysis, or writing or editing assistance), but who do not fulfill authorship criteria, are named with their specific contributions in the Acknowledgments section of the manuscript; (2) all persons named in the Acknowledgments section have provided the corresponding author with written permission to be named in the manuscript; and (3) if an Acknowledgments section is not included, no other persons have made substantial contributions to this manuscript.

Corresponding Author's Signature: \_\_\_\_\_

## 3. Copyright Transfer Agreement.

The American Heart Association, Inc. (AHA), a New York not-for-profit corporation, located at 7272 Greenville Avenue, Dallas, Texas 75231, and the Author hereby agree:

In consideration of the AHA reviewing and editing the Work described below for first and exclusive publication,

Journal Circulation Cardiovascular Genetics  
 Manuscript number 202/964627 R2  
 First author Joshua Lewis  
 Title of Work Genetic Variation in PEAR1 is associated with Platelet Aggregation and Cardiovascular Outcomes

The author who signs below hereby assigns, conveys, and otherwise transfers all rights, title, interest, and copyright ownership in this Work to the AHA when the AHA accepts it for publication.

- "Work" means the material submitted for publication plus any other related material submitted to the AHA.
- The rights assigned to the AHA include (but are not limited to) the rights to
  - edit, publish, reproduce, distribute copies, prepare derivative works, include in indexes or search databases in print, electronic, or other media, (whether or not they are used when this agreement is executed), and
  - claim copyright in this Work throughout the world for as long as it is copyrighted, including renewals or extensions.

All accepted Works become the AHA's property and may not be published elsewhere without the AHA's prior written permission.

- Authors may use parts of the Work (eg, tables, figures) in subsequent works without asking the AHA's permission.

For Works created under grant and accepted for publication in an AHA journal, the author may cause the Accepted Version of the Work to be posted on the Web archive of a body that funded all or part of the Work, and/or an author's institutional repository, provided that this post appears no sooner than 6 months after the AHA publishes the Work in a journal and that

# Authorship Responsibility and Copyright Transfer Agreement

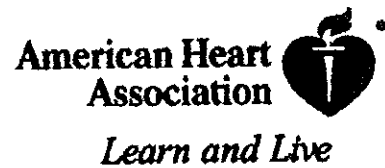

Each author must read and sign the statements in sections 1. (Authorship Responsibility, Criteria, and Contributions) and 3. (either Copyright Transfer or For U.S. Government Employee Authors). If needed, photocopy and distribute this document to coauthors.

Journal Circulation (Cardiovascular Practice) Manuscript number CIRCULV/2012/96462782 First author \_\_\_\_\_

the archive is publicly and noncommercially available via the World Wide Web.

- The "Accepted Version" means the paper includes peer review changes but not AHA's copyediting and production changes.
- "No sooner than 6 months after the AHA publishes the Work" means at least 6 months after the first appearance of the Work either on the AHA journal's Web site as a publish-ahead-of-print article or on the AHA journal's Web site published as part of a regular issue.

### Public Access Policy Funding Disclosure:

Please disclose below if the author has received funding for research on which the article is based from any of the following organizations:

- \_\_\_\_ National Institutes of Health (NIH)
- \_\_\_\_ Wellcome Trust
- \_\_\_\_ Howard Hughes Medical Institute (HHMI)
- \_\_\_\_ Other (please list) \_\_\_\_\_

### For U.S. Government Employee Authors:

The person signing below hereby warrants that the Work described above was written by United States Government employees as part of their official duties and so may be published and reproduced without restriction. (All nongovernment employee authors or coauthors must sign the prior portion of this agreement transferring copyright.)

Author's Printed Name: \_\_\_\_\_

Signature: \_\_\_\_\_

Date Signed: \_\_\_\_\_

Authors hereby represent and warrant that

- they are the sole authors of the Work,
- all authors have participated in and agree with the content and Work's conclusions,
- the Work is original and does not infringe upon any copyright, proprietary, or personal right of any third party, and
- no part of it nor any Work based on substantially similar data has been submitted to another journal for publication.

If the AHA does not publish this Work, the authors will be notified and all rights given to the AHA will revert to them. If this is a joint Work, all coauthors must transfer rights in this Work to the AHA by executing this Agreement. This Agreement must be executed as is without revision or substitution of terms. The author's original, handwritten signature is required. This Agreement is governed by the laws of the United States.

Author's Printed Name: Quince Gibson

Signature: Quince Gibson

Date Signed: Jan 16/2013

# Authorship Responsibility and Copyright Transfer Agreement

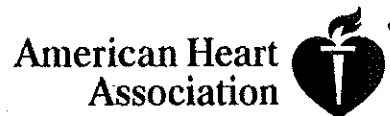

Each author must read and sign the statements in sections 1. (Authorship Responsibility, Criteria, and Contributions) and 3. (either Copyright Transfer or For U.S. Government Employee Authors). If needed, photocopy and distribute this document to coauthors.

Learn and Live

Journal Circulation: Cardiovascular Genetics Manuscript number C1ECVG/2012/964627R2 First author Joshua P. Lewis

## 1. Authorship Responsibility, Criteria, and Contributions.

Each author should meet all criteria below (A, B, and C) and should indicate general and specific contributions by reading the criteria and checking the appropriate lines.

- A. I certify these three things:
- The manuscript represents valid work and neither it nor another one that that I have written with substantially similar content has been published or is being considered for publication elsewhere, except as described in an attachment.
  - If asked, I will provide or fully cooperate in obtaining and providing the data on which the manuscript is based so the editors or their assignees can examine it.
  - For papers with more than 1 author, I agree to allow the corresponding author to
    - be the main correspondent with the editorial office;
    - review the edited manuscript and proof, and
    - make decisions about releasing manuscript information to the media, federal agencies, or both.
- If I am the only author, I will be the corresponding author and agree to handle these responsibilities.

- B. I have given final approval of the submitted manuscript.  
 Yes  No
- C. I have, or a coauthor has, had sufficient access to the data to verify the manuscript's scientific integrity.  
 Yes  No
- D. I have participated sufficiently in the manuscript to take public responsibility for (check only one)  
 part of the content  the whole content.
- E. To qualify for authorship, you must have made substantial contributions to the intellectual content of the paper. Please indicate your contribution(s) to this manuscript. Check all that apply.
- conceived and designed the research
  - acquired the data
  - analyzed and interpreted the data
  - performed statistical analysis
  - handled funding and supervision
  - drafted the manuscript
  - made critical revision of the manuscript for important intellectual content
  - other (specify) \_\_\_\_\_

## 2. Acknowledgment Section (for Corresponding Author Only).

Authors should obtain written permission from all individuals who are listed in the Acknowledgments section of the manuscript, because readers may infer their endorsement of

data and conclusions. The corresponding author must sign the following statement, certifying that (1) all persons who have made substantial contributions in the manuscript (eg, data collection, analysis, or writing or editing assistance), but who do not fulfill authorship criteria, are named with their specific contributions in the Acknowledgments section of the manuscript; (2) all persons named in the Acknowledgments section have provided the corresponding author with written permission to be named in the manuscript; and (3) if an Acknowledgments section is not included, no other persons have made substantial contributions to this manuscript.

Corresponding Author's Signature: \_\_\_\_\_

## 3. Copyright Transfer Agreement.

The American Heart Association, Inc. (AHA), a New York not-for-profit corporation, located at 7272 Greenville Avenue, Dallas, Texas 75231, and the Author hereby agree:

In consideration of the AHA reviewing and editing the Work described below for first and exclusive publication,

Journal Circulation: Cardiovascular Genetics  
Manuscript number C1ECVG/2012/964627R2  
First author Joshua P. Lewis  
Title of Work Genetic Variation in PEAR1 is Associated with Platelet Aggregation and Cardiovascular Outcomes

The author who signs below hereby assigns, conveys, and otherwise transfers all rights, title, interest, and copyright ownership in this Work to the AHA when the AHA accepts it for publication.

- "Work" means the material submitted for publication plus any other related material submitted to the AHA.
- The rights assigned to the AHA include (but are not limited to) the rights to
  - edit, publish, reproduce, distribute copies, prepare derivative works; include in indexes or search databases in print, electronic, or other media, (whether or not they are used when this agreement is executed), and
  - claim copyright in this Work throughout the world for as long as it is copyrighted, including renewals or extensions.

All accepted Works become the AHA's property and may not be published elsewhere without the AHA's prior written permission.

- Authors may use parts of the Work (eg, tables, figures) in subsequent works without asking the AHA's permission.

For Works created under grant and accepted for publication in an AHA journal, the author may cause the Accepted Version of the Work to be posted on the Web archive of a body that funded all or part of the Work, and/or an author's institutional repository, provided that this post appears no sooner than 6 months after the AHA publishes the Work in a journal and that

# Authorship Responsibility and Copyright Transfer Agreement

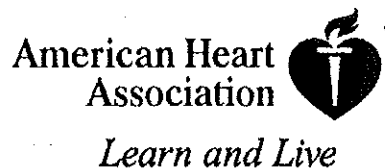

Each author must read and sign the statements in sections 1. (Authorship Responsibility, Criteria, and Contributions) and 3. (either Copyright Transfer or For U.S. Government Employee Authors). If needed, photocopy and distribute this document to coauthors.

Journal \_\_\_\_\_ Manuscript number \_\_\_\_\_ First author \_\_\_\_\_

the archive is publicly and noncommercially available via the World Wide Web.

- The "Accepted Version" means the paper includes peer review changes but not AHA's copyediting and production changes.
- "No sooner than 6 months after the AHA publishes the Work" means at least 6 months after the first appearance of the Work either on the AHA journal's Web site as a publish-ahead-of-print article or on the AHA journal's Web site published as part of a regular issue.

### Public Access Policy Funding Disclosure:

Please disclose below if the author has received funding for research on which the article is based from any of the following organizations:

- National Institutes of Health (NIH)
- Wellcome Trust
- Howard Hughes Medical Institute (HHMI)
- Other (please list) \_\_\_\_\_

Authors hereby represent and warrant that

- they are the sole authors of the Work,
- all authors have participated in and agree with the content and Work's conclusions,
- the Work is original and does not infringe upon any copyright, proprietary, or personal right of any third party, and
- no part of it nor any Work based on substantially similar data has been submitted to another journal for publication.

If the AHA does not publish this Work, the authors will be notified and all rights given to the AHA will revert to them. If this is a joint Work, all coauthors must transfer rights in this Work to the AHA by executing this Agreement. This Agreement must be executed as is without revision or substitution of terms. The author's original, handwritten signature is required. This Agreement is governed by the laws of the United States.

Author's Printed Name: Toni Pollin  
Signature: Toni Pollin  
Date Signed: 1/7/13

### For U.S. Government Employee Authors:

The person signing below hereby warrants that the Work described above was written by United States Government employees as part of their official duties and so may be published and reproduced without restriction. (All nongovernment employee authors or coauthors must sign the prior portion of this agreement transferring copyright.)

Author's Printed Name: \_\_\_\_\_

Signature: \_\_\_\_\_

Date Signed: \_\_\_\_\_

# Authorship Responsibility and Copyright Transfer Agreement

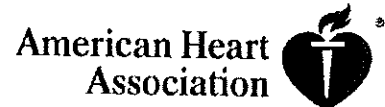

American Heart Association

Learn and Live

Each author must read and sign the statements in sections 1. (Authorship Responsibility, Criteria, and Contributions) and 3. (either Copyright Transfer or For U.S. Government Employee Authors). If needed, photocopy and distribute this document to coauthors.

Journal CIRC CVG Manuscript number 2012/964627 R2 First author Joshua P Lewis

## 1. Authorship Responsibility, Criteria, and Contributions.

Each author should meet all criteria below (A, B, and C) and should indicate general and specific contributions by reading the criteria and checking the appropriate lines.

- A. I certify these three things:
- The manuscript represents valid work and neither it nor another one that I have written with substantially similar content has been published or is being considered for publication elsewhere, except as described in an attachment.
  - If asked, I will provide or fully cooperate in obtaining and providing the data on which the manuscript is based so the editors or their assignees can examine it.
  - For papers with more than 1 author, I agree to allow the corresponding author to
    - be the main correspondent with the editorial office,
    - review the edited manuscript and proof, and
    - make decisions about releasing manuscript information to the media, federal agencies, or both.
- If I am the only author, I will be the corresponding author and agree to handle these responsibilities.

- B. I have given final approval of the submitted manuscript.  
 Yes  No
- C. I have, or a coauthor has, had sufficient access to the data to verify the manuscript's scientific integrity.  
 Yes  No
- D. I have participated sufficiently in the manuscript to take public responsibility for (check only one)  
 part of the content  the whole content.
- E. To qualify for authorship, you must have made substantial contributions to the intellectual content of the paper. Please indicate your contribution(s) to this manuscript. Check all that apply.
- conceived and designed the research
  - acquired the data
  - analyzed and interpreted the data
  - performed statistical analysis
  - handled funding and supervision
  - drafted the manuscript
  - made critical revision of the manuscript for important intellectual content
  - other (specify) \_\_\_\_\_

data and conclusions. The corresponding author must sign the following statement, certifying that (1) all persons who have made substantial contributions in the manuscript (eg, data collection, analysis, or writing or editing assistance), but who do not fulfill authorship criteria, are named with their specific contributions in the Acknowledgments section of the manuscript; (2) all persons named in the Acknowledgments section have provided the corresponding author with written permission to be named in the manuscript; and (3) if an Acknowledgments section is not included, no other persons have made substantial contributions to this manuscript.

Corresponding Author's Signature: \_\_\_\_\_

## 3. Copyright Transfer Agreement.

The American Heart Association, Inc. (AHA), a New York not-for-profit corporation, located at 7272 Greenville Avenue, Dallas, Texas 75231, and the Author hereby agree:

In consideration of the AHA reviewing and editing the Work described below for first and exclusive publication,

Journal CIRC CVG  
 Manuscript number 2012/964627 R2  
 First author Joshua Lewis  
 Title of Work Genetic Variation in PEAR1 is associated with Platelet Aggregation and Cardiovascular Outcomes

The author who signs below hereby assigns, conveys, and otherwise transfers all rights, title, interest, and copyright ownership in this Work to the AHA when the AHA accepts it for publication.

- "Work" means the material submitted for publication plus any other related material submitted to the AHA.
- The rights assigned to the AHA include (but are not limited to) the rights to
  - edit, publish, reproduce, distribute copies, prepare derivative works, include in indexes or search databases in print, electronic, or other media, (whether or not they are used when this agreement is executed), and
  - claim copyright in this Work throughout the world for as long as it is copyrighted, including renewals or extensions.

All accepted Works become the AHA's property and may not be published elsewhere without the AHA's prior written permission.

- Authors may use parts of the Work (eg, tables, figures) in subsequent works without asking the AHA's permission.

For Works created under grant and accepted for publication in an AHA journal, the author may cause the Accepted Version of the Work to be posted on the Web archive of a body that funded all or part of the Work, and/or an author's institutional repository, provided that this post appears no sooner than 6 months after the AHA publishes the Work in a journal and that

## 2. Acknowledgment Section (for Corresponding Author Only).

Authors should obtain written permission from all individuals who are listed in the Acknowledgments section of the manuscript, because readers may infer their endorsement of

## Authorship Responsibility and Copyright Transfer Agreement

Each author must read and sign the statements in sections 1. (Authorship Responsibility, Criteria, and Contributions) and 3. (either Copyright Transfer or For U.S. Government Employee Authors). If needed, photocopy and distribute this document to coauthors.

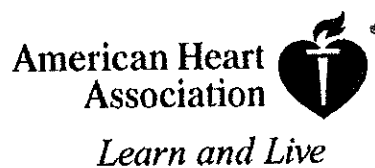

Journal CIRC CVG Manuscript number 2012/964627 R2 First author Joshua P Lewis

the archive is publicly and noncommercially available via the World Wide Web.

- The "Accepted Version" means the paper includes peer review changes but not AHA's copyediting and production changes.
- "No sooner than 6 months after the AHA publishes the Work" means at least 6 months after the first appearance of the Work either on the AHA journal's Web site as a publish-ahead-of-print article or on the AHA journal's Web site published as part of a regular issue.

### Public Access Policy Funding Disclosure:

Please disclose below if the author has received funding for research on which the article is based from any of the following organizations:

- National Institutes of Health (NIH)
- Wellcome Trust
- Howard Hughes Medical Institute (HHMI)
- Other (please list) \_\_\_\_\_

Authors hereby represent and warrant that

- they are the sole authors of the Work,
- all authors have participated in and agree with the content and Work's conclusions,
- the Work is original and does not infringe upon any copyright, proprietary, or personal right of any third party, and
- no part of it nor any Work based on substantially similar data has been submitted to another journal for publication.

If the AHA does not publish this Work, the authors will be notified and all rights given to the AHA will revert to them. If this is a joint Work, all coauthors must transfer rights in this Work to the AHA by executing this Agreement. This Agreement must be executed as is without revision or substitution of terms. The author's original, handwritten signature is required. This Agreement is governed by the laws of the United States.

Author's Printed Name: Braxton D Mitchell  
Signature: Braxton D Mitchell  
Date Signed: 1/7/2013

### For U.S. Government Employee Authors:

The person signing below hereby warrants that the Work described above was written by United States Government employees as part of their official duties and so may be published and reproduced without restriction. (All nongovernment employee authors or coauthors must sign the prior portion of this agreement transferring copyright.)

Author's Printed Name: \_\_\_\_\_

Signature: \_\_\_\_\_

Date Signed: \_\_\_\_\_



# Authorship Responsibility and Copyright Transfer Agreement

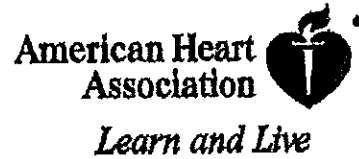

Each author must read and sign the statements in sections 1. (Authorship Responsibility, Criteria, and Contributions) and 3. (either Copyright Transfer or For U.S. Government Employee Authors). If needed, photocopy and distribute this document to coauthors.

Journal Circ CV Genetics Manuscript number 2012/1904627 R2 First author Joshua Lewis

## 1. Authorship Responsibility, Criteria, and Contributions.

Each author should meet all criteria below (A, B, and C) and should indicate general and specific contributions by reading the criteria and checking the appropriate lines.

- A. I certify these three things:
- The manuscript represents valid work and neither it nor another one that that I have written with substantially similar content has been published or is being considered for publication elsewhere, except as described in an attachment.
  - If asked, I will provide or fully cooperate in obtaining and providing the data on which the manuscript is based so the editors or their assignees can examine it.
  - For papers with more than 1 author, I agree to allow the corresponding author to
    - be the main correspondent with the editorial office,
    - review the edited manuscript and proof, and
    - make decisions about releasing manuscript information to the media, federal agencies, or both.

If I am the only author, I will be the corresponding author and agree to handle these responsibilities.

- B. I have given final approval of the submitted manuscript.  
 Yes  No
- C. I have, or a coauthor has, had sufficient access to the data to verify the manuscript's scientific integrity.  
 Yes  No
- D. I have participated sufficiently in the manuscript to take public responsibility for (check only one)  
 part of the content  the whole content.
- E. To qualify for authorship, you must have made substantial contributions to the intellectual content of the paper. Please indicate your contribution(s) to this manuscript. Check all that apply.
- conceived and designed the research
  - acquired the data
  - analyzed and interpreted the data
  - performed statistical analysis
  - handled funding and supervision
  - drafted the manuscript
  - made critical revision of the manuscript for important intellectual content
  - other (specify) \_\_\_\_\_

## 2. Acknowledgment Section (for Corresponding Author Only).

Authors should obtain written permission from all individuals who are listed in the Acknowledgments section of the manuscript, because readers may infer their endorsement of

data and conclusions. The corresponding author must sign the following statement, certifying that (1) all persons who have made substantial contributions in the manuscript (eg, data collection, analysis, or writing or editing assistance), but who do not fulfill authorship criteria, are named with their specific contributions in the Acknowledgments section of the manuscript; (2) all persons named in the Acknowledgments section have provided the corresponding author with written permission to be named in the manuscript; and (3) if an Acknowledgments section is not included, no other persons have made substantial contributions to this manuscript.

Corresponding Author's Signature: \_\_\_\_\_

## 3. Copyright Transfer Agreement.

The American Heart Association, Inc. (AHA), a New York not-for-profit corporation, located at 7272 Greenville Avenue, Dallas, Texas 75231, and the Author hereby agree:

In consideration of the AHA reviewing and editing the Work described below for first and exclusive publication,

Journal Circ Cardiovascul Genetics  
 Manuscript number 2012/1904627 R2  
 First author Joshua Lewis  
 Title of Work Genetic Variation in PEAR1 is Associated with Platelet Aggregation and Cardiovascular Outcomes

The author who signs below hereby assigns, conveys, and otherwise transfers all rights, title, interest, and copyright ownership in this Work to the AHA when the AHA accepts it for publication.

- "Work" means the material submitted for publication plus any other related material submitted to the AHA.
- The rights assigned to the AHA include (but are not limited to) the rights to
  - edit, publish, reproduce, distribute copies, prepare derivative works, include in indexes or search databases in print, electronic, or other media, (whether or not they are used when this agreement is executed), and
  - claim copyright in this Work throughout the world for as long as it is copyrighted, including renewals or extensions.

All accepted Works become the AHA's property and may not be published elsewhere without the AHA's prior written permission.

- Authors may use parts of the Work (eg, tables, figures) in subsequent works without asking the AHA's permission.

For Works created under grant and accepted for publication in an AHA journal, the author may cause the Accepted Version of the Work to be posted on the Web archive of a body that funded all or part of the Work, and/or an author's institutional repository, provided that this post appears no sooner than 6 months after the AHA publishes the Work in a journal and that

## Authorship Responsibility and Copyright Transfer Agreement

Each author must read and sign the statements in sections 1. (Authorship Responsibility, Criteria, and Contributions) and 3. (either Copyright Transfer or For U.S. Government Employee Authors). If needed, photocopy and distribute this document to coauthors.

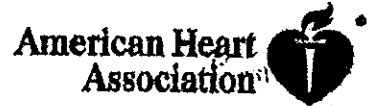

Learn and Live

Journal Circ: CV Genetics Manuscript number 2012/1964/p27-R2 First author Lewis

the archive is publicly and noncommercially available via the World Wide Web.

- The "Accepted Version" means the paper includes peer review changes but not AHA's copyediting and production changes.
- "No sooner than 6 months after the AHA publishes the Work" means at least 6 months after the first appearance of the Work either on the AHA journal's Web site as a publish-ahead-of-print article or on the AHA journal's Web site published as part of a regular issue.

### Public Access Policy Funding Disclosure:

Please disclose below if the author has received funding for research on which the article is based from any of the following organizations:

- National Institutes of Health (NIH)
- Wellcome Trust
- Howard Hughes Medical Institute (HHMI)
- Other (please list) \_\_\_\_\_

Authors hereby represent and warrant that

- they are the sole authors of the Work,
- all authors have participated in and agree with the content and Work's conclusions,
- the Work is original and does not infringe upon any copyright, proprietary, or personal right of any third party, and
- no part of it nor any Work based on substantially similar data has been submitted to another journal for publication.

If the AHA does not publish this Work, the authors will be notified and all rights given to the AHA will revert to them. If this is a joint Work, all coauthors must transfer rights in this Work to the AHA by executing this Agreement. This Agreement must be executed as is without revision or substitution of terms. The author's original, handwritten signature is required. This Agreement is governed by the laws of the United States.

Author's Printed Name: Amber Beitelshoes

Signature: \_\_\_\_\_

Date Signed: 1/7/2013

### For U.S. Government Employee Authors:

The person signing below hereby warrants that the Work described above was written by United States Government employees as part of their official duties and so may be published and reproduced without restriction. (All nongovernment employee authors or coauthors must sign the prior portion of this agreement transferring copyright.)

Author's Printed Name: \_\_\_\_\_

Signature: \_\_\_\_\_

Date Signed: \_\_\_\_\_

# Authorship Responsibility and Copyright Transfer Agreement

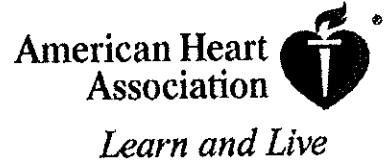

Each author must read and sign the statements in sections 1. (Authorship Responsibility, Criteria, and Contributions) and 3. (either Copyright Transfer or For U.S. Government Employee Authors). If needed, photocopy and distribute this document to coauthors.

Circulation: \_\_\_\_\_  
Journal Cardiovascular Genetics Manuscript number CIRCCVG/2012/964627 R2 First author Joshua P Lewis

## 1. Authorship Responsibility, Criteria, and Contributions.

Each author should meet all criteria below (A, B, and C) and should indicate general and specific contributions by reading the criteria and checking the appropriate lines.

- A. I certify these three things:
- The manuscript represents valid work and neither it nor another one that that I have written with substantially similar content has been published or is being considered for publication elsewhere, except as described in an attachment.
  - If asked, I will provide or fully cooperate in obtaining and providing the data on which the manuscript is based so the editors or their assignees can examine it.
  - For papers with more than 1 author, I agree to allow the corresponding author to
    - be the main correspondent with the editorial office,
    - review the edited manuscript and proof, and
    - make decisions about releasing manuscript information to the media, federal agencies, or both.
- If I am the only author, I will be the corresponding author and agree to handle these responsibilities.

B. I have given final approval of the submitted manuscript.

Yes  No

C. I have, or a coauthor has, had sufficient access to the data to verify the manuscript's scientific integrity.

Yes  No

D. I have participated sufficiently in the manuscript to take public responsibility for (check only one)

part of the content  the whole content.

E. To qualify for authorship, you must have made substantial contributions to the intellectual content of the paper. Please indicate your contribution(s) to this manuscript. Check all that apply.

- conceived and designed the research
- acquired the data
- analyzed and interpreted the data
- performed statistical analysis
- handled funding and supervision
- drafted the manuscript
- made critical revision of the manuscript for important intellectual content
- other (specify) \_\_\_\_\_

## 2. Acknowledgment Section (for Corresponding Author Only).

Authors should obtain written permission from all individuals who are listed in the Acknowledgments section of the manuscript, because readers may infer their endorsement of

data and conclusions. The corresponding author must sign the following statement, certifying that (1) all persons who have made substantial contributions in the manuscript (eg, data collection, analysis, or writing or editing assistance), but who do not fulfill authorship criteria, are named with their specific contributions in the Acknowledgments section of the manuscript; (2) all persons named in the Acknowledgments section have provided the corresponding author with written permission to be named in the manuscript; and (3) if an Acknowledgments section is not included, no other persons have made substantial contributions to this manuscript.

Corresponding Author's Signature: \_\_\_\_\_

## 3. Copyright Transfer Agreement.

The American Heart Association, Inc. (AHA), a New York not-for-profit corporation, located at 7272 Greenville Avenue, Dallas, Texas 75231, and the Author hereby agree:

In consideration of the AHA reviewing and editing the Work described below for first and exclusive publication,

Journal Circulation: Cardiovascular Genetics

Manuscript number CIRCCVG/2012/964627 R2

First author Joshua P Lewis

Title of Work Genetic Variation in PEAR1 Is Associated with

Platelet Aggregation and Cardiovascular Outcomes

The author who signs below hereby assigns, conveys, and otherwise transfers all rights, title, interest, and copyright ownership in this Work to the AHA when the AHA accepts it for publication.

- "Work" means the material submitted for publication plus any other related material submitted to the AHA.
- The rights assigned to the AHA include (but are not limited to) the rights to
  - edit, publish, reproduce, distribute copies, prepare derivative works, include in indexes or search databases in print, electronic, or other media, (whether or not they are used when this agreement is executed), and
  - claim copyright in this Work throughout the world for as long as it is copyrighted, including renewals or extensions.

All accepted Works become the AHA's property and may not be published elsewhere without the AHA's prior written permission.

- Authors may use parts of the Work (eg, tables, figures) in subsequent works without asking the AHA's permission.

For Works created under grant and accepted for publication in an AHA journal, the author may cause the Accepted Version of the Work to be posted on the Web archive of a body that funded all or part of the Work, and/or an author's institutional repository, provided that this post appears no sooner than 6 months after the AHA publishes the Work in a journal and that

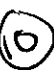

## Authorship Responsibility and Copyright Transfer Agreement

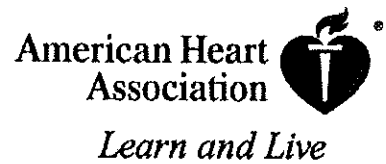

Each author must read and sign the statements in sections 1. (Authorship Responsibility, Criteria, and Contributions) and 3. (either Copyright Transfer or For U.S. Government Employee Authors). If needed, photocopy and distribute this document to coauthors.

Circulation:  
Journal Cardiovascular Genetics Manuscript number CIRCCVG/2012/964627 R2 First author Joshua P Lewis

the archive is publicly and noncommercially available via the World Wide Web.

- The "Accepted Version" means the paper includes peer review changes but not AHA's copyediting and production changes.
- "No sooner than 6 months after the AHA publishes the Work" means at least 6 months after the first appearance of the Work either on the AHA journal's Web site as a publish-ahead-of-print article or on the AHA journal's Web site published as part of a regular issue.

### Public Access Policy Funding Disclosure:

Please disclose below if the author has received funding for research on which the article is based from any of the following organizations:

- National Institutes of Health (NIH)
- Wellcome Trust
- Howard Hughes Medical Institute (HHMI)
- Other (please list) \_\_\_\_\_

Authors hereby represent and warrant that

- they are the sole authors of the Work,
- all authors have participated in and agree with the content and Work's conclusions,
- the Work is original and does not infringe upon any copyright, proprietary, or personal right of any third party, and
- no part of it nor any Work based on substantially similar data has been submitted to another journal for publication.

If the AHA does not publish this Work, the authors will be notified and all rights given to the AHA will revert to them. If this is a joint Work, all coauthors must transfer rights in this Work to the AHA by executing this Agreement. This Agreement must be executed as is without revision or substitution of terms. The author's original, handwritten signature is required. This Agreement is governed by the laws of the United States.

Author's Printed Name: Ruth Pakyz

Signature: 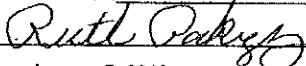

Date Signed: January 7, 2013

### For U.S. Government Employee Authors:

The person signing below hereby warrants that the Work described above was written by United States Government employees as part of their official duties and so may be published and reproduced without restriction. (All nongovernment employee authors or coauthors must sign the prior portion of this agreement transferring copyright.)

Author's Printed Name: \_\_\_\_\_

Signature: \_\_\_\_\_

Date Signed: \_\_\_\_\_

**Authorship Responsibility and Copyright Transfer Agreement**

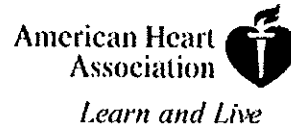

Each author must read and sign the statements in sections 1. (Authorship Responsibility, Criteria, and Contributions) and 3. (either Copyright Transfer or For U.S. Government Employee Authors). If needed, photocopy and distribute this document to coauthors.

Journal Circulation Manuscript number CIRCCVG/2012 First author LEWIS, J

**1. Authorship Responsibility, Criteria, and Contributions.**

Each author should meet all criteria below (A, B, and C) and should indicate general and specific contributions by reading the criteria and checking the appropriate lines.

- A. I certify these three things:
- The manuscript represents valid work and neither it nor another one that I have written with substantially similar content has been published or is being considered for publication elsewhere, except as described in an attachment.
  - If asked, I will provide or fully cooperate in obtaining and providing the data on which the manuscript is based so the editors or their assignees can examine it.
  - For papers with more than 1 author, I agree to allow the corresponding author to
    - be the main correspondent with the editorial office,
    - review the edited manuscript and proof, and
    - make decisions about releasing manuscript information to the media, federal agencies, or both.
- If I am the only author, I will be the corresponding author and agree to handle these responsibilities.

- B. I have given final approval of the submitted manuscript.  
 Yes  No
- C. I have, or a coauthor has, had sufficient access to the data to verify the manuscript's scientific integrity.  
 Yes  No
- D. I have participated sufficiently in the manuscript to take public responsibility for (check only one)  
 part of the content  the whole content.
- E. To qualify for authorship, you must have made substantial contributions to the intellectual content of the paper. Please indicate your contribution(s) to this manuscript. Check all that apply.
- conceived and designed the research
  - acquired the data
  - analyzed and interpreted the data
  - performed statistical analysis
  - handled funding and supervision
  - drafted the manuscript
  - made critical revision of the manuscript for important intellectual content
  - other (specify) \_\_\_\_\_

**2. Acknowledgment Section (for Corresponding Author Only).**

Authors should obtain written permission from all individuals who are listed in the Acknowledgments section of the manuscript, because readers may infer their endorsement of

data and conclusions. The corresponding author must sign the following statement, certifying that (1) all persons who have made substantial contributions in the manuscript (eg, data collection, analysis, or writing or editing assistance), but who do not fulfill authorship criteria, are named with their specific contributions in the Acknowledgments section of the manuscript; (2) all persons named in the Acknowledgments section have provided the corresponding author with written permission to be named in the manuscript; and (3) if an Acknowledgments section is not included, no other persons have made substantial contributions to this manuscript.

Corresponding Author's Signature: \_\_\_\_\_

**3. Copyright Transfer Agreement.**

The American Heart Association, Inc. (AHA), a New York not-for-profit corporation, located at 7272 Greenville Avenue, Dallas, Texas 75231, and the Author hereby agree:

In consideration of the AHA reviewing and editing the Work described below for first and exclusive publication,

Journal CIRCCVG/2012/964627 R2  
 Manuscript number Cardiovascular Genetics  
 First author LEWIS, J

Title of Work Genetic Variation in PEAR1 is Associated with Platelet Aggregation and Cardiovascular Outcomes

The author who signs below hereby assigns, conveys, and otherwise transfers all rights, title, interest, and copyright ownership in this Work to the AHA when the AHA accepts it for publication.

- "Work" means the material submitted for publication plus any other related material submitted to the AHA.
- The rights assigned to the AHA include (but are not limited to) the rights to
  - edit, publish, reproduce, distribute copies, prepare derivative works, include in indexes or search databases in print, electronic, or other media, (whether or not they are used when this agreement is executed), and
  - claim copyright in this Work throughout the world for as long as it is copyrighted, including renewals or extensions.

All accepted Works become the AHA's property and may not be published elsewhere without the AHA's prior written permission.

- Authors may use parts of the Work (eg, tables, figures) in subsequent works without asking the AHA's permission.

For Works created under grant and accepted for publication in an AHA journal, the author may cause the Accepted Version of the Work to be posted on the Web archive of a body that funded all or part of the Work, and/or an author's institutional repository, provided that this post appears no sooner than 6 months after the AHA publishes the Work in a journal and that

**Authorship Responsibility and Copyright Transfer Agreement**

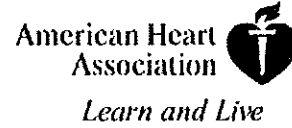

Each author must read and sign the statements in sections 1. (Authorship Responsibility, Criteria, and Contributions) and 3. (either Copyright Transfer or For U.S. Government Employee Authors). If needed, photocopy and distribute this document to coauthors.

Journal Circulation Manuscript number CV6/2012/964627R2 First author Lewis J.

the archive is publicly and noncommercially available via the World Wide Web.

- The "Accepted Version" means the paper includes peer review changes but not AHA's copyediting and production changes.
- "No sooner than 6 months after the AHA publishes the Work" means at least 6 months after the first appearance of the Work either on the AHA journal's Web site as a publish-ahead-of-print article or on the AHA journal's Web site published as part of a regular issue.

**Public Access Policy Funding Disclosure:**

Please disclose below if the author has received funding for research on which the article is based from any of the following organizations:

- National Institutes of Health (NIH)
- Wellcome Trust
- Howard Hughes Medical Institute (HHMI)
- Other (please list) \_\_\_\_\_

**For U.S. Government Employee Authors:**

The person signing below hereby warrants that the Work described above was written by United States Government employees as part of their official duties and so may be published and reproduced without restriction. (All nongovernment employee authors or coauthors must sign the prior portion of this agreement transferring copyright.)

Author's Printed Name: \_\_\_\_\_

Signature: \_\_\_\_\_

Date Signed: \_\_\_\_\_

**Authors hereby represent and warrant that**

- they are the sole authors of the Work,
- all authors have participated in and agree with the content and Work's conclusions,
- the Work is original and does not infringe upon any copyright, proprietary, or personal right of any third party, and
- no part of it nor any Work based on substantially similar data has been submitted to another journal for publication.

If the AHA does not publish this Work, the authors will be notified and all rights given to the AHA will revert to them. If this is a joint Work, all coauthors must transfer rights in this Work to the AHA by executing this Agreement. This Agreement must be executed as is without revision or substitution of terms. The author's original, handwritten signature is required. This Agreement is governed by the laws of the United States.

Author's Printed Name: Keith Tanner

Signature: Keith Tanner

Date Signed: 1/7/13

# Authorship Responsibility and Copyright Transfer Agreement

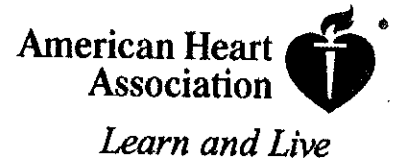

Each author must read and sign the statements in sections 1. (Authorship Responsibility, Criteria, and Contributions) and 3. (either Copyright Transfer or For U.S. Government Employee Authors). If needed, photocopy and distribute this document to coauthors.

Journal Circulation Cardiovascular Genetics Manuscript number CIRCVA/2012/964627 R2 First author Joshua P Lewis

## 1. Authorship Responsibility, Criteria, and Contributions.

Each author should meet all criteria below (A, B, and C) and should indicate general and specific contributions by reading the criteria and checking the appropriate lines.

### A. I certify these three things:

- The manuscript represents valid work and neither it nor another one that that I have written with substantially similar content has been published or is being considered for publication elsewhere, except as described in an attachment.
- If asked, I will provide or fully cooperate in obtaining and providing the data on which the manuscript is based so the editors or their assignees can examine it.
- For papers with more than 1 author, I agree to allow the corresponding author to
  - be the main correspondent with the editorial office,
  - review the edited manuscript and proof, and
  - make decisions about releasing manuscript information to the media, federal agencies, or both.

If I am the only author, I will be the corresponding author and agree to handle these responsibilities.

### B. I have given final approval of the submitted manuscript.

Yes  No

### C. I have, or a coauthor has, had sufficient access to the data to verify the manuscript's scientific integrity.

Yes  No

### D. I have participated sufficiently in the manuscript to take public responsibility for (check only one)

part of the content  the whole content.

### E. To qualify for authorship, you must have made substantial contributions to the intellectual content of the paper. Please indicate your contribution(s) to this manuscript. Check all that apply.

- conceived and designed the research
- acquired the data
- analyzed and interpreted the data
- performed statistical analysis
- handled funding and supervision
- drafted the manuscript
- made critical revision of the manuscript for important intellectual content
- other (specify) \_\_\_\_\_

## 2. Acknowledgment Section (for Corresponding Author Only).

Authors should obtain written permission from all individuals who are listed in the Acknowledgments section of the manuscript, because readers may infer their endorsement of

data and conclusions. The corresponding author must sign the following statement, certifying that (1) all persons who have made substantial contributions in the manuscript (eg, data collection, analysis, or writing or editing assistance), but who do not fulfill authorship criteria, are named with their specific contributions in the Acknowledgments section of the manuscript; (2) all persons named in the Acknowledgments section have provided the corresponding author with written permission to be named in the manuscript; and (3) if an Acknowledgments section is not included, no other persons have made substantial contributions to this manuscript.

Corresponding Author's Signature: \_\_\_\_\_

## 3. Copyright Transfer Agreement.

The American Heart Association, Inc. (AHA), a New York not-for-profit corporation, located at 7272 Greenville Avenue, Dallas, Texas 75231, and the Author hereby agree:

In consideration of the AHA reviewing and editing the Work described below for first and exclusive publication,

Journal Circulation Cardiovascular Genetics  
 Manuscript number CIRCVA/2012/964627 R2  
 First author Joshua P Lewis  
 Title of Work Genetic Variation in PEAB2 is Associated with Plaque Aggregation and Cardiovascular Outcomes

The author who signs below hereby assigns, conveys, and otherwise transfers all rights, title, interest, and copyright ownership in this Work to the AHA when the AHA accepts it for publication.

- "Work" means the material submitted for publication plus any other related material submitted to the AHA.
- The rights assigned to the AHA include (but are not limited to) the rights to
  - edit, publish, reproduce, distribute copies, prepare derivative works, include in indexes or search databases in print, electronic, or other media, (whether or not they are used when this agreement is executed), and
  - claim copyright in this Work throughout the world for as long as it is copyrighted, including renewals or extensions.

All accepted Works become the AHA's property and may not be published elsewhere without the AHA's prior written permission.

- Authors may use parts of the Work (eg, tables, figures) in subsequent works without asking the AHA's permission.

For Works created under grant and accepted for publication in an AHA journal, the author may cause the Accepted Version of the Work to be posted on the Web archive of a body that funded all or part of the Work, and/or an author's institutional repository, provided that this post appears no sooner than 6 months after the AHA publishes the Work in a journal and that

# Authorship Responsibility and Copyright Transfer Agreement

Each author must read and sign the statements in sections 1. (Authorship Responsibility, Criteria, and Contributions) and 3. (either Copyright Transfer or For U.S. Government Employee Authors). If needed, photocopy and distribute this document to coauthors.

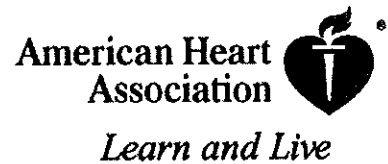

Journal \_\_\_\_\_ Manuscript number \_\_\_\_\_ First author \_\_\_\_\_

the archive is publicly and noncommercially available via the World Wide Web.

- The "Accepted Version" means the paper includes peer review changes but not AHA's copyediting and production changes.
- "No sooner than 6 months after the AHA publishes the Work" means at least 6 months after the first appearance of the Work either on the AHA journal's Web site as a publish-ahead-of-print article or on the AHA journal's Web site published as part of a regular issue.

### Public Access Policy Funding Disclosure:

Please disclose below if the author has received funding for research on which the article is based from any of the following organizations:

- National Institutes of Health (NIH)
- Wellcome Trust
- Howard Hughes Medical Institute (HHMI)
- Other (please list) \_\_\_\_\_

### For U.S. Government Employee Authors:

The person signing below hereby warrants that the Work described above was written by United States Government employees as part of their official duties and so may be published and reproduced without restriction. (All nongovernment employee authors or coauthors must sign the prior portion of this agreement transferring copyright.)

Author's Printed Name: \_\_\_\_\_

Signature: \_\_\_\_\_

Date Signed: \_\_\_\_\_

Authors hereby represent and warrant that

- they are the sole authors of the Work,
- all authors have participated in and agree with the content and Work's conclusions,
- the Work is original and does not infringe upon any copyright, proprietary, or personal right of any third party, and
- no part of it nor any Work based on substantially similar data has been submitted to another journal for publication.

If the AHA does not publish this Work, the authors will be notified and all rights given to the AHA will revert to them. If this is a joint Work, all coauthors must transfer rights in this Work to the AHA by executing this Agreement. This Agreement must be executed as is without revision or substitution of terms. The author's original, handwritten signature is required. This Agreement is governed by the laws of the United States.

Author's Printed Name: PARSHIA PARSA

Signature: [Handwritten Signature]

Date Signed: 1/13/13



# Authorship Responsibility and Copyright Transfer Agreement

Each author must read and sign the statements in sections 1. (Authorship Responsibility, Criteria, and Contributions) and 3. (either Copyright Transfer or For U.S. Government Employee Authors). If needed, photocopy and distribute this document to coauthors.

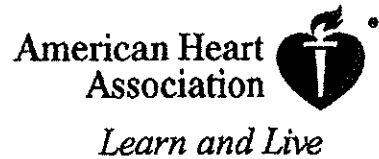

Journal Circulation: Cardiovascular Genetics Manuscript number C100016/2012/964627 R2 First author Joshua Lewis PhD

## 1. Authorship Responsibility, Criteria, and Contributions.

Each author should meet all criteria below (A, B, and C) and should indicate general and specific contributions by reading the criteria and checking the appropriate lines.

- A. I certify these three things:
- The manuscript represents valid work and neither it nor another one that that I have written with substantially similar content has been published or is being considered for publication elsewhere, except as described in an attachment.
  - If asked, I will provide or fully cooperate in obtaining and providing the data on which the manuscript is based so the editors or their assignees can examine it.
  - For papers with more than 1 author, I agree to allow the corresponding author to
    - be the main correspondent with the editorial office,
    - review the edited manuscript and proof, and
    - make decisions about releasing manuscript information to the media, federal agencies, or both.

If I am the only author, I will be the corresponding author and agree to handle these responsibilities.

- B. I have  given final approval of the submitted manuscript.  
 Yes  No
- C. I have, or a coauthor has, had sufficient access to the data to verify the manuscript's scientific integrity.  
 Yes  No
- D. I have participated sufficiently in the manuscript to take public responsibility for (check only one)  
 part of the content  the whole content.
- E. To qualify for authorship, you must have made substantial contributions to the intellectual content of the paper. Please indicate your contribution(s) to this manuscript. Check all that apply.
- conceived and designed the research
  - acquired the data
  - analyzed and interpreted the data
  - performed statistical analysis
  - handled funding and supervision
  - drafted the manuscript
  - made critical revision of the manuscript for important intellectual content
  - other (specify) \_\_\_\_\_

## 2. Acknowledgment Section (for Corresponding Author Only).

Authors should obtain written permission from all individuals who are listed in the Acknowledgments section of the manuscript, because readers may infer their endorsement of

data and conclusions. The corresponding author must sign the following statement, certifying that (1) all persons who have made substantial contributions in the manuscript (eg, data collection, analysis, or writing or editing assistance), but who do not fulfill authorship criteria, are named with their specific contributions in the Acknowledgments section of the manuscript; (2) all persons named in the Acknowledgments section have provided the corresponding author with written permission to be named in the manuscript; and (3) if an Acknowledgments section is not included, no other persons have made substantial contributions to this manuscript.

Corresponding Author's Signature: \_\_\_\_\_

## 3. Copyright Transfer Agreement.

The American Heart Association, Inc. (AHA), a New York not-for-profit corporation, located at 7272 Greenville Avenue, Dallas, Texas 75231, and the Author hereby agree:

In consideration of the AHA reviewing and editing the Work described below for first and exclusive publication,

Journal Circulation: Cardiovascular Genetics  
 Manuscript number C100016/2012/964627 R2  
 First author Joshua Lewis PhD  
 Title of Work Genetic Variation in PPAR1 is Associated with Platelet Aggregation & Cardiovascular Outcomes

The author who signs below hereby assigns, conveys, and otherwise transfers all rights, title, interest, and copyright ownership in this Work to the AHA when the AHA accepts it for publication.

- "Work" means the material submitted for publication plus any other related material submitted to the AHA.
- The rights assigned to the AHA include (but are not limited to) the rights to
  - edit, publish, reproduce, distribute copies, prepare derivative works, include in indexes or search databases in print, electronic, or other media, (whether or not they are used when this agreement is executed), and
  - claim copyright in this Work throughout the world for as long as it is copyrighted, including renewals or extensions.

All accepted Works become the AHA's property and may not be published elsewhere without the AHA's prior written permission.

- Authors may use parts of the Work (eg, tables, figures) in subsequent works without asking the AHA's permission.

For Works created under grant and accepted for publication in an AHA journal, the author may cause the Accepted Version of the Work to be posted on the Web archive of a body that funded all or part of the Work, and/or an author's institutional repository, provided that this post appears no sooner than 6 months after the AHA publishes the Work in a journal and that

# Authorship Responsibility and Copyright Transfer Agreement

Each author must read and sign the statements in sections 1. (Authorship Responsibility, Criteria, and Contributions) and 3. (either Copyright Transfer or For U.S. Government Employee Authors). If needed, photocopy and distribute this document to coauthors.

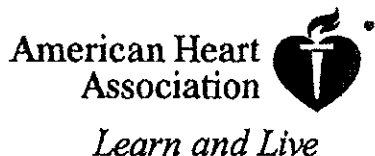

Journal: Circulation: Cardiovascular Genetics Manuscript number: C12666/2012/964627A2 First author: Joshua Lewis

the archive is publicly and noncommercially available via the World Wide Web.

- The "Accepted Version" means the paper includes peer review changes but not AHA's copyediting and production changes.
- "No sooner than 6 months after the AHA publishes the Work" means at least 6 months after the first appearance of the Work either on the AHA journal's Web site as a publish-ahead-of-print article or on the AHA journal's Web site published as part of a regular issue.

### Public Access Policy Funding Disclosure:

Please disclose below if the author has received funding for research on which the article is based from any of the following organizations:

- National Institutes of Health (NIH)
- Wellcome Trust
- Howard Hughes Medical Institute (HHMI)
- Other (please list) \_\_\_\_\_

### For U.S. Government Employee Authors:

The person signing below hereby warrants that the Work described above was written by United States Government employees as part of their official duties and so may be published and reproduced without restriction. (All nongovernment employee authors or coauthors must sign the prior portion of this agreement transferring copyright.)

Author's Printed Name: \_\_\_\_\_

Signature: \_\_\_\_\_

Date Signed: \_\_\_\_\_

Authors hereby represent and warrant that

- they are the sole authors of the Work,
- all authors have participated in and agree with the content and Work's conclusions,
- the Work is original and does not infringe upon any copyright, proprietary, or personal right of any third party, and
- no part of it nor any Work based on substantially similar data has been submitted to another journal for publication.

If the AHA does not publish this Work, the authors will be notified and all rights given to the AHA will revert to them. If this is a joint Work, all coauthors must transfer rights in this Work to the AHA by executing this Agreement. This Agreement must be executed as is without revision or substitution of terms. The author's original, handwritten signature is required. This Agreement is governed by the laws of the United States.

Author's Printed Name: Udaya T

Signature: [Handwritten Signature]

Date Signed: 1/7/13

# Authorship Responsibility and Copyright Transfer Agreement

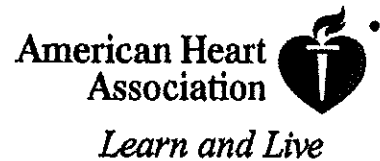

Each author must read and sign the statements in sections 1. (Authorship Responsibility, Criteria, and Contributions) and 3. (either Copyright Transfer or For U.S. Government Employee Authors). If needed, photocopy and distribute this document to coauthors.

Journal Circulation: Cardiovascular Genetics Manuscript number C100006/02/964627R2 First author Joshua Lewis PhD

## 1. Authorship Responsibility, Criteria, and Contributions.

Each author should meet all criteria below (A, B, and C) and should indicate general and specific contributions by reading the criteria and checking the appropriate lines.

- A. I certify these three things:
- The manuscript represents valid work and neither it nor another one that that I have written with substantially similar content has been published or is being considered for publication elsewhere, except as described in an attachment.
  - If asked, I will provide or fully cooperate in obtaining and providing the data on which the manuscript is based so the editors or their assignees can examine it.
  - For papers with more than 1 author, I agree to allow the corresponding author to
    - be the main correspondent with the editorial office,
    - review the edited manuscript and proof, and
    - make decisions about releasing manuscript information to the media, federal agencies, or both.
- If I am the only author, I will be the corresponding author and agree to handle these responsibilities.
- B. I have given final approval of the submitted manuscript.
- Yes  No
- C. I have, or a coauthor has, had sufficient access to the data to verify the manuscript's scientific integrity.
- Yes  No
- D. I have participated sufficiently in the manuscript to take public responsibility for (check only one)
- part of the content  the whole content.
- E. To qualify for authorship, you must have made substantial contributions to the intellectual content of the paper. Please indicate your contribution(s) to this manuscript. Check all that apply.
- conceived and designed the research
  - acquired the data
  - analyzed and interpreted the data
  - performed statistical analysis
  - handled funding and supervision
  - drafted the manuscript
  - made critical revision of the manuscript for important intellectual content
  - other (specify) \_\_\_\_\_

data and conclusions. The corresponding author must sign the following statement, certifying that (1) all persons who have made substantial contributions in the manuscript (eg, data collection, analysis, or writing or editing assistance), but who do not fulfill authorship criteria, are named with their specific contributions in the Acknowledgments section of the manuscript; (2) all persons named in the Acknowledgments section have provided the corresponding author with written permission to be named in the manuscript; and (3) if an Acknowledgments section is not included, no other persons have made substantial contributions to this manuscript.

Corresponding Author's Signature: \_\_\_\_\_

## 3. Copyright Transfer Agreement.

The American Heart Association, Inc. (AHA), a New York not-for-profit corporation, located at 7272 Greenville Avenue, Dallas, Texas 75231, and the Author hereby agree:

In consideration of the AHA reviewing and editing the Work described below for first and exclusive publication,

Journal Circulation: Cardiovascular Genetics  
 Manuscript number C100006/02/964627R2  
 First author Joshua Lewis PhD  
 Title of Work Genetic Variation in PEARL is associated with Platelet Aggregation & Cardiovascular Outcomes

The author who signs below hereby assigns, conveys, and otherwise transfers all rights, title, interest, and copyright ownership in this Work to the AHA when the AHA accepts it for publication.

- "Work" means the material submitted for publication plus any other related material submitted to the AHA.
- The rights assigned to the AHA include (but are not limited to) the rights to
  - edit, publish, reproduce, distribute copies, prepare derivative works, include in indexes or search databases in print, electronic, or other media, (whether or not they are used when this agreement is executed), and
  - claim copyright in this Work throughout the world for as long as it is copyrighted, including renewals or extensions.

All accepted Works become the AHA's property and may not be published elsewhere without the AHA's prior written permission.

- Authors may use parts of the Work (eg, tables, figures) in subsequent works without asking the AHA's permission.

For Works created under grant and accepted for publication in an AHA journal, the author may cause the Accepted Version of the Work to be posted on the Web archive of a body that funded all or part of the Work, and/or an author's institutional repository, provided that this post appears no sooner than 6 months after the AHA publishes the Work in a journal and that

## Authorship Responsibility and Copyright Transfer Agreement

Each author must read and sign the statements in sections 1. (Authorship Responsibility, Criteria, and Contributions) and 3. (either Copyright Transfer or For U.S. Government Employee Authors). If needed, photocopy and distribute this document to coauthors.

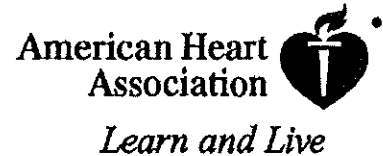

Journal/Circulation: Circulation: Cardiovascular Quality and Outcomes Manuscript number Circulation/2013/127/127 First author Joshua Lewis

the archive is publicly and noncommercially available via the World Wide Web.

- The "Accepted Version" means the paper includes peer review changes but not AHA's copyediting and production changes.
- "No sooner than 6 months after the AHA publishes the Work" means at least 6 months after the first appearance of the Work either on the AHA journal's Web site as a publish-ahead-of-print article or on the AHA journal's Web site published as part of a regular issue.

### Public Access Policy Funding Disclosure:

Please disclose below if the author has received funding for research on which the article is based from any of the following organizations:

- National Institutes of Health (NIH)
- Wellcome Trust
- Howard Hughes Medical Institute (HHMI)
- Other (please list) \_\_\_\_\_

### For U.S. Government Employee Authors:

The person signing below hereby warrants that the Work described above was written by United States Government employees as part of their official duties and so may be published and reproduced without restriction. (All nongovernment employee authors or coauthors must sign the prior portion of this agreement transferring copyright.)

Author's Printed Name: \_\_\_\_\_

Signature: \_\_\_\_\_

Date Signed: \_\_\_\_\_

Authors hereby represent and warrant that

- they are the sole authors of the Work,
- all authors have participated in and agree with the content and Work's conclusions,
- the Work is original and does not infringe upon any copyright, proprietary, or personal right of any third party, and
- no part of it nor any Work based on substantially similar data has been submitted to another journal for publication.

If the AHA does not publish this Work, the authors will be notified and all rights given to the AHA will revert to them. If this is a joint Work, all coauthors must transfer rights in this Work to the AHA by executing this Agreement. This Agreement must be executed as is without revision or substitution of terms. The author's original, handwritten signature is required. This Agreement is governed by the laws of the United States.

Author's Printed Name: Lewis P Bloder

Signature: \_\_\_\_\_

Date Signed: 1/2/13

# Authorship Responsibility and Copyright Transfer Agreement

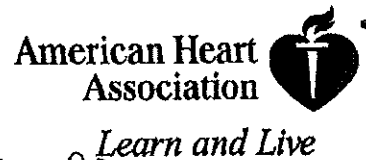

Each author must read and sign the statements in sections 1. (Authorship Responsibility, Criteria, and Contributions) and 3. (either Copyright Transfer or For U.S. Government Employee Authors). If needed, photocopy and distribute this document to coauthors.

Journal Circ CV Genetics Manuscript number CRC CV 2014 96462-22 First author Joshua P. Lewis

## 1. Authorship Responsibility, Criteria, and Contributions.

Each author should meet all criteria below (A, B, and C) and should indicate general and specific contributions by reading the criteria and checking the appropriate lines.

- A. I certify these three things:
- The manuscript represents valid work and neither it nor another one that that I have written with substantially similar content has been published or is being considered for publication elsewhere, except as described in an attachment.
  - If asked, I will provide or fully cooperate in obtaining and providing the data on which the manuscript is based so the editors or their assignees can examine it.
  - For papers with more than 1 author, I agree to allow the corresponding author to
    - be the main correspondent with the editorial office,
    - review the edited manuscript and proof, and
    - make decisions about releasing manuscript information to the media, federal agencies, or both.

If I am the only author, I will be the corresponding author and agree to handle these responsibilities.

- B. I have given final approval of the submitted manuscript.  
 Yes  No
- C. I have, or a coauthor has, had sufficient access to the data to verify the manuscript's scientific integrity.  
 Yes  No
- D. I have participated sufficiently in the manuscript to take public responsibility for (check only one)  
 part of the content  the whole content.
- E. To qualify for authorship, you must have made substantial contributions to the intellectual content of the paper. Please indicate your contribution(s) to this manuscript. Check all that apply.
- conceived and designed the research
  - acquired the data
  - analyzed and interpreted the data
  - performed statistical analysis
  - handled funding and supervision
  - drafted the manuscript
  - made critical revision of the manuscript for important intellectual content
  - other (specify) \_\_\_\_\_

## 2. Acknowledgment Section (for Corresponding Author Only).

Authors should obtain written permission from all individuals who are listed in the Acknowledgments section of the manuscript, because readers may infer their endorsement of

data and conclusions. The corresponding author must sign the following statement, certifying that (1) all persons who have made substantial contributions in the manuscript (eg, data collection, analysis, or writing or editing assistance), but who do not fulfill authorship criteria, are named with their specific contributions in the Acknowledgments section of the manuscript; (2) all persons named in the Acknowledgments section have provided the corresponding author with written permission to be named in the manuscript; and (3) if an Acknowledgments section is not included, no other persons have made substantial contributions to this manuscript.

Corresponding Author's Signature: \_\_\_\_\_

## 3. Copyright Transfer Agreement.

The American Heart Association, Inc. (AHA), a New York not-for-profit corporation, located at 7272 Greenville Avenue, Dallas, Texas 75231, and the Author hereby agree:

In consideration of the AHA reviewing and editing the Work described below for first and exclusive publication,

Journal \_\_\_\_\_  
 Manuscript number Circ CV Genetics  
 First author Joshua P. Lewis  
 Title of Work Genetic Variation in PEAR1 is Associated with Platelet Aggregation + CV Outcomes

The author who signs below hereby assigns, conveys, and otherwise transfers all rights, title, interest, and copyright ownership in this Work to the AHA when the AHA accepts it for publication.

- "Work" means the material submitted for publication plus any other related material submitted to the AHA.
- The rights assigned to the AHA include (but are not limited to) the rights to
  - edit, publish, reproduce, distribute copies, prepare derivative works, include in indexes or search databases in print, electronic, or other media, (whether or not they are used when this agreement is executed), and
  - claim copyright in this Work throughout the world for as long as it is copyrighted, including renewals or extensions.

All accepted Works become the AHA's property and may not be published elsewhere without the AHA's prior written permission.

- Authors may use parts of the Work (eg, tables, figures) in subsequent works without asking the AHA's permission.

For Works created under grant and accepted for publication in an AHA journal, the author may cause the Accepted Version of the Work to be posted on the Web archive of a body that funded all or part of the Work, and/or an author's institutional repository, provided that this post appears no sooner than 6 months after the AHA publishes the Work in a journal and that

**Authorship Responsibility and Copyright Transfer Agreement**

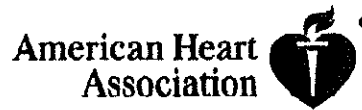

Each author must read and sign the statements in sections 1. (Authorship Responsibility, Criteria, and Contributions) and 3. (either Copyright Transfer or For U.S. Government Employee Authors). If needed, photocopy and distribute this document to coauthors.

Learn and Live

Journal Circ. CV genetics Manuscript number CIRCCVG120121964627R2 First author Justina P. Lwin

the archive is publicly and noncommercially available via the World Wide Web.

- The "Accepted Version" means the paper includes peer review changes but not AHA's copyediting and production changes.
- "No sooner than 6 months after the AHA publishes the Work" means at least 6 months after the first appearance of the Work either on the AHA Journal's Web site as a publish-ahead-of-print article or on the AHA journal's Web site published as part of a regular issue.

**Public Access Policy Funding Disclosure:**

Please disclose below if the author has received funding for research on which the article is based from any of the following organizations:

- National Institutes of Health (NIH)
- Wellcome Trust
- Howard Hughes Medical Institute (HHMI)
- Other (please list) \_\_\_\_\_

**For U.S. Government Employee Authors:**

The person signing below hereby warrants that the Work described above was written by United States Government employees as part of their official duties and so may be published and reproduced without restriction. (All nongovernment employee authors or coauthors must sign the prior portion of this agreement transferring copyright.)

Author's Printed Name: \_\_\_\_\_

Signature: \_\_\_\_\_

Date Signed: \_\_\_\_\_

Authors hereby represent and warrant that

- they are the sole authors of the Work,
- all authors have participated in and agree with the content and Work's conclusions,
- the Work is original and does not infringe upon any copyright, proprietary, or personal right of any third party, and
- no part of it nor any Work based on substantially similar data has been submitted to another journal for publication.

If the AHA does not publish this Work, the authors will be notified and all rights given to the AHA will revert to them. If this is a joint Work, all coauthors must transfer rights in this Work to the AHA by executing this Agreement. This Agreement must be executed as is without revision or substitution of terms. The author's original, handwritten signature is required. This Agreement is governed by the laws of the United States.

Author's Printed Name: Wendy Post, MD

Signature: [Handwritten Signature]

Date Signed: 1/23/13

# Authorship Responsibility and Copyright Transfer Agreement

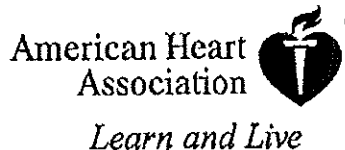

Each author must read and sign the statements in sections 1. (Authorship Responsibility, Criteria, and Contributions) and 3. (either Copyright Transfer or For U.S. Government Employee Authors). If needed, photocopy and distribute this document to coauthors.

Journal Circulation Cardiovasc Genet Manuscript number CIRCCVG/2012/1964627 First author Lewis, JP

## 1. Authorship Responsibility, Criteria, and Contributions.

Each author should meet all criteria below (A, B, and C) and should indicate general and specific contributions by reading the criteria and checking the appropriate lines.

- A. I certify these three things:
- The manuscript represents valid work and neither it nor another one that that I have written with substantially similar content has been published or is being considered for publication elsewhere, except as described in an attachment.
  - If asked, I will provide or fully cooperate in obtaining and providing the data on which the manuscript is based so the editors or their assignees can examine it.
  - For papers with more than 1 author, I agree to allow the corresponding author to
    - be the main correspondent with the editorial office,
    - review the edited manuscript and proof, and
    - make decisions about releasing manuscript information to the media, federal agencies, or both.
- If I am the only author, I will be the corresponding author and agree to handle these responsibilities.
- B. I have given final approval of the submitted manuscript.  
 Yes                       No
- C. I have, or a coauthor has, had sufficient access to the data to verify the manuscript's scientific integrity.  
 Yes                       No
- D. I have participated sufficiently in the manuscript to take public responsibility for (check only one)  
 part of the content                       the whole content.
- E. To qualify for authorship, you must have made substantial contributions to the intellectual content of the paper. Please indicate your contribution(s) to this manuscript. Check all that apply.
- conceived and designed the research
  - acquired the data
  - analyzed and interpreted the data
  - performed statistical analysis
  - handled funding and supervision
  - drafted the manuscript
  - made critical revision of the manuscript for important intellectual content
  - other (specify) \_\_\_\_\_

data and conclusions. The corresponding author must sign the following statement, certifying that (1) all persons who have made substantial contributions in the manuscript (eg, data collection, analysis, or writing or editing assistance), but who do not fulfill authorship criteria, are named with their specific contributions in the Acknowledgments section of the manuscript; (2) all persons named in the Acknowledgments section have provided the corresponding author with written permission to be named in the manuscript; and (3) if an Acknowledgments section is not included, no other persons have made substantial contributions to this manuscript.

Corresponding Author's Signature: \_\_\_\_\_

## 3. Copyright Transfer Agreement.

The American Heart Association, Inc. (AHA), a New York not-for-profit corporation, located at 7272 Greenville Avenue, Dallas, Texas 75231, and the Author hereby agree:

In consideration of the AHA reviewing and editing the Work described below for first and exclusive publication,

Journal Circulation Cardiovascular Genetics  
 Manuscript number CIRCCVG 2012/1964627  
 First author Joshua P. Lewis  
 Title of Work Genetic Variation in PEAR1 Is Associated with Platelet Aggregation and Cardiovascular Outcomes

The author who signs below hereby assigns, conveys, and otherwise transfers all rights, title, interest, and copyright ownership in this Work to the AHA when the AHA accepts it for publication.

- "Work" means the material submitted for publication plus any other related material submitted to the AHA.
- The rights assigned to the AHA include (but are not limited to) the rights to
  - edit, publish, reproduce, distribute copies, prepare derivative works, include in indexes or search databases in print, electronic, or other media, (whether or not they are used when this agreement is executed), and
  - claim copyright in this Work throughout the world for as long as it is copyrighted, including renewals or extensions.

All accepted Works become the AHA's property and may not be published elsewhere without the AHA's prior written permission.

- Authors may use parts of the Work (eg, tables, figures) in subsequent works without asking the AHA's permission.

For Works created under grant and accepted for publication in an AHA journal, the author may cause the Accepted Version of the Work to be posted on the Web archive of a body that funded all or part of the Work, and/or an author's institutional repository, provided that this post appears no sooner than 6 months after the AHA publishes the Work in a journal and that

## 2. Acknowledgment Section (for Corresponding Author Only).

Authors should obtain written permission from all individuals who are listed in the Acknowledgments section of the manuscript, because readers may infer their endorsement of

## Authorship Responsibility and Copyright Transfer Agreement

Each author must read and sign the statements in sections 1. (Authorship Responsibility, Criteria, and Contributions) and 3. (either Copyright Transfer or For U.S. Government Employee Authors). If needed, photocopy and distribute this document to coauthors.

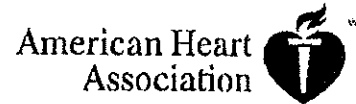

Learn and Live

Journal Circ Cardiovasc Genet Manuscript number CCV6/2012/96427 First author Lewis, JP

the archive is publicly and noncommercially available via the World Wide Web.

- The "Accepted Version" means the paper includes peer review changes but not AHA's copyediting and production changes.
- "No sooner than 6 months after the AHA publishes the Work" means at least 6 months after the first appearance of the Work either on the AHA journal's Web site as a publish-ahead-of-print article or on the AHA journal's Web site published as part of a regular issue.

### Public Access Policy Funding Disclosure:

Please disclose below if the author has received funding for research on which the article is based from any of the following organizations:

- National Institutes of Health (NIH)  
 Wellcome Trust  
 Howard Hughes Medical Institute (HHMI)  
 Other (please list) \_\_\_\_\_

### For U.S. Government Employee Authors:

The person signing below hereby warrants that the Work described above was written by United States Government employees as part of their official duties and so may be published and reproduced without restriction. (All nongovernment employee authors or coauthors must sign the prior portion of this agreement transferring copyright.)

Author's Printed Name: \_\_\_\_\_

Signature: \_\_\_\_\_

Date Signed: \_\_\_\_\_

Authors hereby represent and warrant that

- they are the sole authors of the Work,
- all authors have participated in and agree with the content and Work's conclusions,
- the Work is original and does not infringe upon any copyright, proprietary, or personal right of any third party, and
- no part of it nor any Work based on substantially similar data has been submitted to another journal for publication.

If the AHA does not publish this Work, the authors will be notified and all rights given to the AHA will revert to them. If this is a joint Work, all coauthors must transfer rights in this Work to the AHA by executing this Agreement. This Agreement must be executed as is without revision or substitution of terms. The author's original, handwritten signature is required. This Agreement is governed by the laws of the United States.

Author's Printed Name: Nauder Faraday

Signature: Nauder Faraday

Date Signed: 1/7/13



## Authorship Responsibility and Copyright Transfer Agreement

Each author must read and sign the statements in sections 1. (Authorship Responsibility, Criteria, and Contributions) and 3. (either Copyright Transfer or For U.S. Government Employee Authors). If needed, photocopy and distribute this document to coauthors.

American Heart  
Association

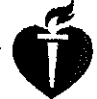

Learn and Live

Journal Circulation: CV Genetics Manuscript number CIRCCVG/2012/964627 R2 First author Joshua P Lewis

### 1. Authorship Responsibility, Criteria, and Contributions.

Each author should meet all criteria below (A, B, and C) and should indicate general and specific contributions by reading the criteria and checking the appropriate lines.

#### A. I certify these three things:

- The manuscript represents valid work and neither it nor another one that I have written with substantially similar content has been published or is being considered for publication elsewhere, except as described in an attachment.
- If asked, I will provide or fully cooperate in obtaining and providing the data on which the manuscript is based so the editors or their assignees can examine it.
- For papers with more than 1 author, I agree to allow the corresponding author to
  - be the main correspondent with the editorial office,
  - review the edited manuscript and proof, and
  - make decisions about releasing manuscript information to the media, federal agencies, or both.

If I am the only author, I will be the corresponding author and agree to handle these responsibilities.

#### B. I have given final approval of the submitted manuscript.

Yes  No

#### C. I have, or a coauthor has, had sufficient access to the data to verify the manuscript's scientific integrity.

Yes  No

#### D. I have participated sufficiently in the manuscript to take public responsibility for (check only one)

part of the content  the whole content.

#### E. To qualify for authorship, you must have made substantial contributions to the intellectual content of the paper. Please indicate your contribution(s) to this manuscript. Check all that apply.

- conceived and designed the research
- acquired the data
- analyzed and interpreted the data
- performed statistical analysis
- handled funding and supervision
- drafted the manuscript
- made critical revision of the manuscript for important intellectual content
- other (specify) \_\_\_\_\_

### 2. Acknowledgment Section (for Corresponding Author Only).

Authors should obtain written permission from all individuals who are listed in the Acknowledgments section of the manuscript, because readers may infer their endorsement of

data and conclusions. The corresponding author must sign the following statement, certifying that (1) all persons who have made substantial contributions in the manuscript (eg, data collection, analysis, or writing or editing assistance), but who do not fulfill authorship criteria, are named with their specific contributions in the Acknowledgments section of the manuscript; (2) all persons named in the Acknowledgments section have provided the corresponding author with written permission to be named in the manuscript; and (3) if an Acknowledgments section is not included, no other persons have made substantial contributions to this manuscript.

Corresponding Author's Signature: \_\_\_\_\_

### 3. Copyright Transfer Agreement.

The American Heart Association, Inc. (AHA), a New York not-for-profit corporation, located at 7272 Greenville Avenue, Dallas, Texas 75231, and the Author hereby agree:

In consideration of the AHA reviewing and editing the Work described below for first and exclusive publication,

Journal Circulation: Cardiovascular Genetics

Manuscript number CIRCCVG/2012/964627 R2

First author Joshua P Lewis

Title of Work Genetic Variation in PEAR1 is Associated with Platelet Aggregation and Cardiovascular Outcomes

The author who signs below hereby assigns, conveys, and otherwise transfers all rights, title, interest, and copyright ownership in this Work to the AHA when the AHA accepts it for publication.

- "Work" means the material submitted for publication plus any other related material submitted to the AHA.
- The rights assigned to the AHA include (but are not limited to) the rights to
  - edit, publish, reproduce, distribute copies, prepare derivative works, include in indexes or search databases in print, electronic, or other media, (whether or not they are used when this agreement is executed), and
  - claim copyright in this Work throughout the world for as long as it is copyrighted, including renewals or extensions.

All accepted Works become the AHA's property and may not be published elsewhere without the AHA's prior written permission.

- Authors may use parts of the Work (eg, tables, figures) in subsequent works without asking the AHA's permission.

For Works created under grant and accepted for publication in an AHA journal, the author may cause the Accepted Version of the Work to be posted on the Web archive of a body that funded all or part of the Work, and/or an author's institutional repository, provided that this post appears no sooner than 6 months after the AHA publishes the Work in a journal and that

### Authorship Responsibility and Copyright Transfer Agreement

Each author must read and sign the statements in sections 1. (Authorship Responsibility, Criteria, and Contributions) and 3. (either Copyright Transfer or For U.S. Government Employee Authors). If needed, photocopy and distribute this document to coauthors.

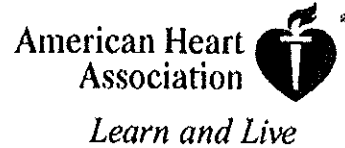

Journal Circulation Cardiovascular Genetics Manuscript number CIRCVG/2012/9646.27R2 First author Joshua P Lewis

the archive is publicly and noncommercially available via the World Wide Web.

- The "Accepted Version" means the paper includes peer review changes but not AHA's copyediting and production changes.
- "No sooner than 6 months after the AHA publishes the Work" means at least 6 months after the first appearance of the Work either on the AHA journal's Web site as a publish-ahead-of-print article or on the AHA journal's Web site published as part of a regular issue.

#### Public Access Policy Funding Disclosure:

Please disclose below if the author has received funding for research on which the article is based from any of the following organizations:

- National Institutes of Health (NIH)
- Wellcome Trust
- Howard Hughes Medical Institute (HHMI)
- Other (please list) \_\_\_\_\_

#### For U.S. Government Employee Authors:

The person signing below hereby warrants that the Work described above was written by United States Government employees as part of their official duties and so may be published and reproduced without restriction. (All nongovernment employee authors or coauthors must sign the prior portion of this agreement transferring copyright.)

Author's Printed Name: \_\_\_\_\_

Signature: \_\_\_\_\_

Date Signed: \_\_\_\_\_

Authors hereby represent and warrant that

- they are the sole authors of the Work,
- all authors have participated in and agree with the content and Work's conclusions,
- the Work is original and does not infringe upon any copyright, proprietary, or personal right of any third party, and
- no part of it nor any Work based on substantially similar data has been submitted to another journal for publication.

If the AHA does not publish this Work, the authors will be notified and all rights given to the AHA will revert to them. If this is a joint Work, all coauthors must transfer rights in this Work to the AHA by executing this Agreement. This Agreement must be executed as is without revision or substitution of terms. The author's original, handwritten signature is required. This Agreement is governed by the laws of the United States.

Author's Printed Name: William Herzog

Signature: William Herzog MD

Date Signed: Jan 11, 2013

**Authorship Responsibility and Copyright Transfer Agreement**

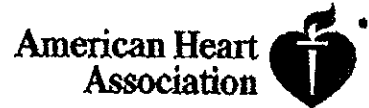

*Learn and Live*

Each author must read and sign the statements in sections 1. (Authorship Responsibility, Criteria, and Contributions) and 3. (either Copyright Transfer or For U.S. Government Employee Authors). If needed, photocopy and distribute this document to coauthors.

Journal Circulation: cardiovascular Genetics Manuscript number CIRCNG/2012/964627 R2 First author Joshua P Lewis

**1. Authorship Responsibility, Criteria, and Contributions.**

Each author should meet all criteria below (A, B, and C) and should indicate general and specific contributions by reading the criteria and checking the appropriate lines.

- JPL* A. I certify these three things:
- The manuscript represents valid work and neither it nor another one that that I have written with substantially similar content has been published or is being considered for publication elsewhere, except as described in an attachment.
  - If asked, I will provide or fully cooperate in obtaining and providing the data on which the manuscript is based so the editors or their assignees can examine it.
  - For papers with more than 1 author, I agree to allow the corresponding author to
    - be the main correspondent with the editorial office,
    - review the edited manuscript and proof, and
    - make decisions about releasing manuscript information to the media, federal agencies, or both.

If I am the only author, I will be the corresponding author and agree to handle these responsibilities.

- B. I have given final approval of the submitted manuscript.  
*JPL* Yes  No
- C. I have, or a coauthor has, had sufficient access to the data to verify the manuscript's scientific integrity.  
*JPL* Yes  No
- D. I have participated sufficiently in the manuscript to take public responsibility for (check only one)  
*JPL* part of the content  the whole content.
- E. To qualify for authorship, you must have made substantial contributions to the intellectual content of the paper. Please indicate your contribution(s) to this manuscript. Check all that apply.
- conceived and designed the research
  - acquired the data
  - JPL* analyzed and interpreted the data
  - JPL* performed statistical analysis
  - handled funding and supervision
  - drafted the manuscript
  - JPL* made critical revision of the manuscript for important intellectual content
  - other (specify) \_\_\_\_\_

data and conclusions. The corresponding author must sign the following statement, certifying that (1) all persons who have made substantial contributions in the manuscript (eg, data collection, analysis, or writing or editing assistance), but who do not fulfill authorship criteria, are named with their specific contributions in the Acknowledgments section of the manuscript; (2) all persons named in the Acknowledgments section have provided the corresponding author with written permission to be named in the manuscript; and (3) if an Acknowledgments section is not included, no other persons have made substantial contributions to this manuscript.

Corresponding Author's Signature: \_\_\_\_\_

**3. Copyright Transfer Agreement.**

The American Heart Association, Inc. (AHA), a New York not-for-profit corporation, located at 7272 Greenville Avenue, Dallas, Texas 75231, and the Author hereby agree:

In consideration of the AHA reviewing and editing the Work described below for first and exclusive publication,

Journal Circulation: Cardiovascular Genetics  
 Manuscript number CIRCNG/2012/964627 R2  
 First author Joshua Lewis  
 Title of Work Genetic Variation in PEAR1 is Associated with Platelet aggregation and Cardiovascular Outcomes

The author who signs below hereby assigns, conveys, and otherwise transfers all rights, title, interest, and copyright ownership in this Work to the AHA when the AHA accepts it for publication.

- "Work" means the material submitted for publication plus any other related material submitted to the AHA.
  - The rights assigned to the AHA include (but are not limited to) the rights to
    - edit, publish, reproduce, distribute copies, prepare derivative works, include in indexes or search databases in print, electronic, or other media, (whether or not they are used when this agreement is executed), and
    - claim copyright in this Work throughout the world for as long as it is copyrighted, including renewals or extensions.
- All accepted Works become the AHA's property and may not be published elsewhere without the AHA's prior written permission.
- Authors may use parts of the Work (eg, tables, figures) in subsequent works without asking the AHA's permission.

For Works created under grant and accepted for publication in an AHA journal, the author may cause the Accepted Version of the Work to be posted on the Web archive of a body that funded all or part of the Work, and/or an author's institutional repository, provided that this post appears no sooner than 6 months after the AHA publishes the Work in a journal and that

**2. Acknowledgment Section (for Corresponding Author Only).**

Authors should obtain written permission from all individuals who are listed in the Acknowledgments section of the manuscript, because readers may infer their endorsement of

## Authorship Responsibility and Copyright Transfer Agreement

Each author must read and sign the statements in sections 1. (Authorship Responsibility, Criteria, and Contributions) and 3. (either Copyright Transfer or For U.S. Government Employee Authors). If needed, photocopy and distribute this document to coauthors.

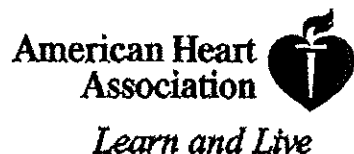

Journal Circulation: Cardiovascular Genetics Manuscript number CIRCVG/2012/94427 R2 First author Joshua P Lewis

the archive is publicly and noncommercially available via the World Wide Web.

- The "Accepted Version" means the paper includes peer review changes but not AHA's copyediting and production changes.
- "No sooner than 6 months after the AHA publishes the Work" means at least 6 months after the first appearance of the Work either on the AHA journal's Web site as a publish-ahead-of-print article or on the AHA journal's Web site published as part of a regular issue.

### Public Access Policy Funding Disclosure:

Please disclose below if the author has received funding for research on which the article is based from any of the following organizations:

- National Institutes of Health (NIH)  
 Wellcome Trust  
 Howard Hughes Medical Institute (HHMI)  
 Other (please list) \_\_\_\_\_

Authors hereby represent and warrant that

- they are the sole authors of the Work,
- all authors have participated in and agree with the content and Work's conclusions,
- the Work is original and does not infringe upon any copyright, proprietary, or personal right of any third party, and
- no part of it nor any Work based on substantially similar data has been submitted to another journal for publication.

If the AHA does not publish this Work, the authors will be notified and all rights given to the AHA will revert to them. If this is a joint Work, all coauthors must transfer rights in this Work to the AHA by executing this Agreement. This Agreement must be executed as is without revision or substitution of terms. The author's original, handwritten signature is required. This Agreement is governed by the laws of the United States.

Author's Printed Name: Yan Gong

Signature: 

Date Signed: 1/7/2013

### For U.S. Government Employee Authors:

The person signing below hereby warrants that the Work described above was written by United States Government employees as part of their official duties and so may be published and reproduced without restriction. (All nongovernment employee authors or coauthors must sign the prior portion of this agreement transferring copyright.)

Author's Printed Name: \_\_\_\_\_

Signature: \_\_\_\_\_

Date Signed: \_\_\_\_\_

## Authorship Responsibility and Copyright Transfer Agreement

Each author must read and sign the statements in sections 1. (Authorship Responsibility, Criteria, and Contributions) and 3. (either Copyright Transfer or For U.S. Government Employee Authors). If needed, photocopy and distribute this document to coauthors.

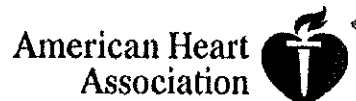

Learn and Live

Circulation: Cardiovascular Genetics      CIRCCVG/2012/964627 R2  
 Journal \_\_\_\_\_ Manuscript number \_\_\_\_\_ First author Joshua P. Lewis

### 1. Authorship Responsibility, Criteria, and Contributions.

Each author should meet all criteria below (A, B, and C) and should indicate general and specific contributions by reading the criteria and checking the appropriate lines.

- A. I certify these three things:
- The manuscript represents valid work and neither it nor another one that that I have written with substantially similar content has been published or is being considered for publication elsewhere, except as described in an attachment.
  - If asked, I will provide or fully cooperate in obtaining and providing the data on which the manuscript is based so the editors or their assignees can examine it.
  - For papers with more than 1 author, I agree to allow the corresponding author to
    - be the main correspondent with the editorial office,
    - review the edited manuscript and proof, and
    - make decisions about releasing manuscript information to the media, federal agencies, or both.
- If I am the only author, I will be the corresponding author and agree to handle these responsibilities.

- B. I have given final approval of the submitted manuscript.  
 Yes      \_\_\_\_\_ No
- C. I have, or a coauthor has, had sufficient access to the data to verify the manuscript's scientific integrity.  
 Yes      \_\_\_\_\_ No
- D. I have participated sufficiently in the manuscript to take public responsibility for (check only one)  
 part of the content      \_\_\_\_\_ the whole content.
- E. To qualify for authorship, you must have made substantial contributions to the intellectual content of the paper. Please indicate your contribution(s) to this manuscript. Check all that apply.
- conceived and designed the research
  - acquired the data
  - analyzed and interpreted the data
  - \_\_\_\_\_ performed statistical analysis
  - handled funding and supervision
  - \_\_\_\_\_ drafted the manuscript
  - made critical revision of the manuscript for important intellectual content
  - \_\_\_\_\_ other (specify) \_\_\_\_\_

### 2. Acknowledgment Section (for Corresponding Author Only).

Authors should obtain written permission from all individuals who are listed in the Acknowledgments section of the manuscript, because readers may infer their endorsement of

data and conclusions. The corresponding author must sign the following statement, certifying that (1) all persons who have made substantial contributions in the manuscript (eg, data collection, analysis, or writing or editing assistance), but who do not fulfill authorship criteria, are named with their specific contributions in the Acknowledgments section of the manuscript; (2) all persons named in the Acknowledgments section have provided the corresponding author with written permission to be named in the manuscript; and (3) if an Acknowledgments section is not included, no other persons have made substantial contributions to this manuscript.

Corresponding Author's Signature: \_\_\_\_\_

### 3. Copyright Transfer Agreement.

The American Heart Association, Inc. (AHA), a New York not-for-profit corporation, located at 7272 Greenville Avenue, Dallas, Texas 75231, and the Author hereby agree:

In consideration of the AHA reviewing and editing the Work described below for first and exclusive publication,

Journal Circulation: Cardiovascular Genetics  
 Manuscript number CIRCCVG/2012/964627/R2  
 First author Joshua P. Lewis  
 Title of Work Genetic Variation in PEAR1 is Associated with Platelet Aggregation and Cardiovascular Outcomes

The author who signs below hereby assigns, conveys, and otherwise transfers all rights, title, interest, and copyright ownership in this Work to the AHA when the AHA accepts it for publication.

- "Work" means the material submitted for publication plus any other related material submitted to the AHA.
- The rights assigned to the AHA include (but are not limited to) the rights to
  - edit, publish, reproduce, distribute copies, prepare derivative works, include in indexes or search databases in print, electronic, or other media, (whether or not they are used when this agreement is executed), and
  - claim copyright in this Work throughout the world for as long as it is copyrighted, including renewals or extensions.

All accepted Works become the AHA's property and may not be published elsewhere without the AHA's prior written permission.

- Authors may use parts of the Work (eg, tables, figures) in subsequent works without asking the AHA's permission.

For Works created under grant and accepted for publication in an AHA journal, the author may cause the Accepted Version of the Work to be posted on the Web archive of a body that funded all or part of the Work, and/or an author's institutional repository, provided that this post appears no sooner than 6 months after the AHA publishes the Work in a journal and that

## Authorship Responsibility and Copyright Transfer Agreement

Each author must read and sign the statements in sections 1. (Authorship Responsibility, Criteria, and Contributions) and 3. (either Copyright Transfer or For U.S. Government Employee Authors). If needed, photocopy and distribute this document to coauthors.

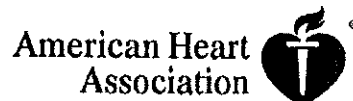

Learn and Live

Circulation: Cardiovascular Genetics CYRCCVG/2012/964627 R2  
Journal \_\_\_\_\_ Manuscript number \_\_\_\_\_ First author Joshua P. Lewis

the archive is publicly and noncommercially available via the World Wide Web.

- The "Accepted Version" means the paper includes peer review changes but not AHA's copyediting and production changes.
- "No sooner than 6 months after the AHA publishes the Work" means at least 6 months after the first appearance of the Work either on the AHA journal's Web site as a publish-ahead-of-print article or on the AHA journal's Web site published as part of a regular issue.

### Public Access Policy Funding Disclosure:

Please disclose below if the author has received funding for research on which the article is based from any of the following organizations:

- National Institutes of Health (NIH)
- Wellcome Trust
- Howard Hughes Medical Institute (HHMI)
- Other (please list) \_\_\_\_\_

### For U.S. Government Employee Authors:

The person signing below hereby warrants that the Work described above was written by United States Government employees as part of their official duties and so may be published and reproduced without restriction. (All nongovernment employee authors or coauthors must sign the prior portion of this agreement transferring copyright.)

Author's Printed Name: \_\_\_\_\_

Signature: \_\_\_\_\_

Date Signed: \_\_\_\_\_

Authors hereby represent and warrant that

- they are the sole authors of the Work,
- all authors have participated in and agree with the content and Work's conclusions,
- the Work is original and does not infringe upon any copyright, proprietary, or personal right of any third party, and
- no part of it nor any Work based on substantially similar data has been submitted to another journal for publication.

If the AHA does not publish this Work, the authors will be notified and all rights given to the AHA will revert to them. If this is a joint Work, all coauthors must transfer rights in this Work to the AHA by executing this Agreement. This Agreement must be executed as is without revision or substitution of terms. The author's original, handwritten signature is required. This Agreement is governed by the laws of the United States.

Author's Printed Name CARL J. REPINE

Signature: [Handwritten Signature]

Date Signed: 1-28-13

**Authorship Responsibility and Copyright Transfer Agreement**

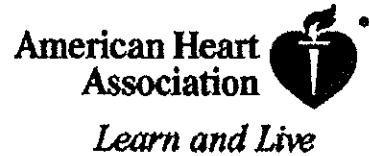

Each author must read and sign the statements in sections 1. (Authorship Responsibility, Criteria, and Contributions) and 3. (either Copyright Transfer or For U.S. Government Employee Authors). If needed, photocopy and distribute this document to coauthors.

Journal CIRCCVG Manuscript number CIRCCVG/2012/964627 R2 First author Joshua P. Lewis

**1. Authorship Responsibility, Criteria, and Contributions.**

Each author should meet all criteria below (A, B, and C) and should indicate general and specific contributions by reading the criteria and checking the appropriate lines.

- A. I certify these three things:**
  - The manuscript represents valid work and neither it nor another one that I have written with substantially similar content has been published or is being considered for publication elsewhere, except as described in an attachment.
  - If asked, I will provide or fully cooperate in obtaining and providing the data on which the manuscript is based so the editors or their assignees can examine it.
  - For papers with more than 1 author, I agree to allow the corresponding author to
    - be the main correspondent with the editorial office,
    - review the edited manuscript and proof, and
    - make decisions about releasing manuscript information to the media, federal agencies, or both.

If I am the only author, I will be the corresponding author and agree to handle these responsibilities.

- B. I have given final approval of the submitted manuscript.**  
 Yes                       No
- C. I have, or a coauthor has, had sufficient access to the data to verify the manuscript's scientific integrity.**  
 Yes                       No
- D. I have participated sufficiently in the manuscript to take public responsibility for (check only one)**  
 part of the content       the whole content.
- E. To qualify for authorship, you must have made substantial contributions to the intellectual content of the paper. Please indicate your contribution(s) to this manuscript. Check all that apply.**
  - conceived and designed the research
  - acquired the data
  - analyzed and interpreted the data
  - performed statistical analysis
  - handled funding and supervision
  - drafted the manuscript
  - made critical revision of the manuscript for important intellectual content
  - other (specify) \_\_\_\_\_

data and conclusions. The corresponding author must sign the following statement, certifying that (1) all persons who have made substantial contributions in the manuscript (eg, data collection, analysis, or writing or editing assistance), but who do not fulfill authorship criteria, are named with their specific contributions in the Acknowledgments section of the manuscript; (2) all persons named in the Acknowledgments section have provided the corresponding author with written permission to be named in the manuscript; and (3) if an Acknowledgments section is not included, no other persons have made substantial contributions to this manuscript.

Corresponding Author's Signature: \_\_\_\_\_

**3. Copyright Transfer Agreement.**  
The American Heart Association, Inc. (AHA), a New York not-for-profit corporation, located at 7272 Greenville Avenue, Dallas, Texas 75231, and the Author hereby agree:

In consideration of the AHA reviewing and editing the Work described below for first and exclusive publication,

Journal Circulation: CVG  
 Manuscript number CIRCCVG/2012/964627 R2  
 First author Joshua P. Lewis  
 Title of Work Genetic Variation in PEAR1 is Associated with Platelet Aggregation and Cardiovascular Outcomes

The author who signs below hereby assigns, conveys, and otherwise transfers all rights, title, interest, and copyright ownership in this Work to the AHA when the AHA accepts it for publication.

- "Work" means the material submitted for publication plus any other related material submitted to the AHA.
- The rights assigned to the AHA include (but are not limited to) the rights to
  - edit, publish, reproduce, distribute copies, prepare derivative works, include in indexes or search databases in print, electronic, or other media, (whether or not they are used when this agreement is executed), and
  - claim copyright in this Work throughout the world for as long as it is copyrighted, including renewals or extensions.

All accepted Works become the AHA's property and may not be published elsewhere without the AHA's prior written permission.

- Authors may use parts of the Work (eg, tables, figures) in subsequent works without asking the AHA's permission.

For Works created under grant and accepted for publication in an AHA journal, the author may cause the Accepted Version of the Work to be posted on the Web archive of a body that funded all or part of the Work, and/or an author's institutional repository, provided that this post appears no sooner than 6 months after the AHA publishes the Work in a journal and that

**2. Acknowledgment Section (for Corresponding Author Only).**  
Authors should obtain written permission from all individuals who are listed in the Acknowledgments section of the manuscript, because readers may infer their endorsement of

## Authorship Responsibility and Copyright Transfer Agreement

Each author must read and sign the statements in sections 1. (Authorship Responsibility, Criteria, and Contributions) and 3. (either Copyright Transfer or For U.S. Government Employee Authors). If needed, photocopy and distribute this document to coauthors.

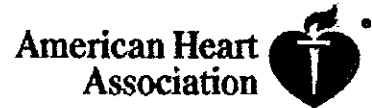

Learn and Live

Journal CIRCCVG Manuscript number CIRCCVG/2012/964627\_R2 First author Joshua P. Lewis

the archive is publicly and noncommercially available via the World Wide Web.

- The "Accepted Version" means the paper includes peer review changes but not AHA's copyediting and production changes.
- "No sooner than 6 months after the AHA publishes the Work" means at least 6 months after the first appearance of the Work either on the AHA journal's Web site as a publish-ahead-of-print article or on the AHA journal's Web site published as part of a regular issue.

### Public Access Policy Funding Disclosure:

Please disclose below if the author has received funding for research on which the article is based from any of the following organizations:

- National Institutes of Health (NIH)  
 Wellcome Trust  
 Howard Hughes Medical Institute (HHMI)  
 Other (please list) \_\_\_\_\_

Authors hereby represent and warrant that

- they are the sole authors of the Work,
- all authors have participated in and agree with the content and Work's conclusions,
- the Work is original and does not infringe upon any copyright, proprietary, or personal right of any third party, and
- no part of it nor any Work based on substantially similar data has been submitted to another journal for publication.

If the AHA does not publish this Work, the authors will be notified and all rights given to the AHA will revert to them. If this is a joint Work, all coauthors must transfer rights in this Work to the AHA by executing this Agreement. This Agreement must be executed as is without revision or substitution of terms. The author's original, handwritten signature is required. This Agreement is governed by the laws of the United States.

Author's Printed Name: Julia A. Johnson

Signature: 

Date Signed: \_\_\_\_\_

### For U.S. Government Employee Authors:

The person signing below hereby warrants that the Work described above was written by United States Government employees as part of their official duties and so may be published and reproduced without restriction. (All nongovernment employee authors or coauthors must sign the prior portion of this agreement transferring copyright.)

Author's Printed Name: \_\_\_\_\_

Signature: \_\_\_\_\_

Date Signed: \_\_\_\_\_



# Authorship Responsibility and Copyright Transfer Agreement

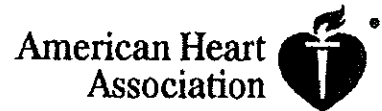

American Heart Association

Learn and Live

Each author must read and sign the statements in sections 1. (Authorship Responsibility, Criteria, and Contributions) and 3. (either Copyright Transfer or For U.S. Government Employee Authors). If needed, photocopy and distribute this document to coauthors.

Journal Circulation: Cardiovascular Genetics Manuscript number CIRCULO 012 964627 R2 First author Joshua Lewis PhD

## 1. Authorship Responsibility, Criteria, and Contributions.

Each author should meet all criteria below (A, B, and C) and should indicate general and specific contributions by reading the criteria and checking the appropriate lines.

### A. I certify these three things:

- The manuscript represents valid work and neither it nor another one that that I have written with substantially similar content has been published or is being considered for publication elsewhere, except as described in an attachment.
- If asked, I will provide or fully cooperate in obtaining and providing the data on which the manuscript is based so the editors or their assignees can examine it.
- For papers with more than 1 author, I agree to allow the corresponding author to
  - be the main correspondent with the editorial office,
  - review the edited manuscript and proof, and
  - make decisions about releasing manuscript information to the media, federal agencies, or both.

If I am the only author, I will be the corresponding author and agree to handle these responsibilities.

### B. I have given final approval of the submitted manuscript.

Yes  No

### C. I have, or a coauthor has, had sufficient access to the data to verify the manuscript's scientific integrity.

Yes  No

### D. I have participated sufficiently in the manuscript to take public responsibility for (check only one)

part of the content  the whole content.

### E. To qualify for authorship, you must have made substantial contributions to the intellectual content of the paper. Please indicate your contribution(s) to this manuscript. Check all that apply.

- conceived and designed the research
- acquired the data
- analyzed and interpreted the data
- performed statistical analysis
- handled funding and supervision
- drafted the manuscript
- made critical revision of the manuscript for important intellectual content
- other (specify) \_\_\_\_\_

## 2. Acknowledgment Section (for Corresponding Author Only).

Authors should obtain written permission from all individuals who are listed in the Acknowledgments section of the manuscript, because readers may infer their endorsement of

data and conclusions. The corresponding author must sign the following statement, certifying that (1) all persons who have made substantial contributions in the manuscript (eg, data collection, analysis, or writing or editing assistance), but who do not fulfill authorship criteria, are named with their specific contributions in the Acknowledgments section of the manuscript; (2) all persons named in the Acknowledgments section have provided the corresponding author with written permission to be named in the manuscript; and (3) if an Acknowledgments section is not included, no other persons have made substantial contributions to this manuscript.

Corresponding Author's Signature: \_\_\_\_\_

## 3. Copyright Transfer Agreement.

The American Heart Association, Inc. (AHA), a New York not-for-profit corporation, located at 7272 Greenville Avenue, Dallas, Texas 75231, and the Author hereby agree:

In consideration of the AHA reviewing and editing the Work described below for first and exclusive publication,

Journal Circulation: Cardiovascular Genetics

Manuscript number CIRCULO 012 964627 R2

First author Joshua Lewis PhD

Title of Work Genetic Variation in PPAR1 $\alpha$

Associated with Platelet Aggregation & Cardiovascular outcomes

The author who signs below hereby assigns, conveys, and otherwise transfers all rights, title, interest, and copyright ownership in this Work to the AHA when the AHA accepts it for publication.

- "Work" means the material submitted for publication plus any other related material submitted to the AHA.
- The rights assigned to the AHA include (but are not limited to) the rights to
  - edit, publish, reproduce, distribute copies, prepare derivative works, include in indexes or search databases in print, electronic, or other media, (whether or not they are used when this agreement is executed), and
  - claim copyright in this Work throughout the world for as long as it is copyrighted, including renewals or extensions.

All accepted Works become the AHA's property and may not be published elsewhere without the AHA's prior written permission.

- Authors may use parts of the Work (eg, tables, figures) in subsequent works without asking the AHA's permission.

For Works created under grant and accepted for publication in an AHA journal, the author may cause the Accepted Version of the Work to be posted on the Web archive of a body that funded all or part of the Work, and/or an author's institutional repository, provided that this post appears no sooner than 6 months after the AHA publishes the Work in a journal and that

# Authorship Responsibility and Copyright Transfer Agreement

Each author must read and sign the statements in sections 1. (Authorship Responsibility, Criteria, and Contributions) and 3. (either Copyright Transfer or For U.S. Government Employee Authors). If needed, photocopy and distribute this document to coauthors.

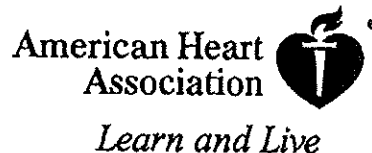

Journal: Circulation: Cardiac vascular topics Manuscript number: C110006/2010/1964627A2 First author: Joshua Lewis

the archive is publicly and noncommercially available via the World Wide Web.

- The "Accepted Version" means the paper includes peer review changes but not AHA's copyediting and production changes.
- "No sooner than 6 months after the AHA publishes the Work" means at least 6 months after the first appearance of the Work either on the AHA journal's Web site as a publish-ahead-of-print article or on the AHA journal's Web site published as part of a regular issue.

### Public Access Policy Funding Disclosure:

Please disclose below if the author has received funding for research on which the article is based from any of the following organizations:

- National Institutes of Health (NIH)
- Wellcome Trust
- Howard Hughes Medical Institute (HHMI)
- Other (please list) \_\_\_\_\_

### For U.S. Government Employee Authors:

The person signing below hereby warrants that the Work described above was written by United States Government employees as part of their official duties and so may be published and reproduced without restriction. (All nongovernment employee authors or coauthors must sign the prior portion of this agreement transferring copyright.)

Author's Printed Name: \_\_\_\_\_

Signature: \_\_\_\_\_

Date Signed: \_\_\_\_\_

Authors hereby represent and warrant that

- they are the sole authors of the Work,
- all authors have participated in and agree with the content and Work's conclusions,
- the Work is original and does not infringe upon any copyright, proprietary, or personal right of any third party, and
- no part of it nor any Work based on substantially similar data has been submitted to another journal for publication.

If the AHA does not publish this Work, the authors will be notified and all rights given to the AHA will revert to them. If this is a joint Work, all coauthors must transfer rights in this Work to the AHA by executing this Agreement. This Agreement must be executed as is without revision or substitution of terms. The author's original, handwritten signature is required. This Agreement is governed by the laws of the United States.

Author's Printed Name: Paul Gurnoor

Signature: \_\_\_\_\_

Date Signed: 1/7/13

# Authorship Responsibility and Copyright Transfer Agreement

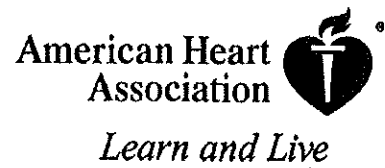

Each author must read and sign the statements in sections 1. (Authorship Responsibility, Criteria, and Contributions) and 3. (either Copyright Transfer or For U.S. Government Employee Authors). If needed, photocopy and distribute this document to coauthors.

Journal Genetics Manuscript number 964627 First author Lewis, Joshua

## 1. Authorship Responsibility, Criteria, and Contributions.

Each author should meet all criteria below (A, B, and C) and should indicate general and specific contributions by reading the criteria and checking the appropriate lines.

- A. I certify these three things:
- The manuscript represents valid work and neither it nor another one that that I have written with substantially similar content has been published or is being considered for publication elsewhere, except as described in an attachment.
  - If asked, I will provide or fully cooperate in obtaining and providing the data on which the manuscript is based so the editors or their assignees can examine it.
  - For papers with more than 1 author, I agree to allow the corresponding author to
    - be the main correspondent with the editorial office,
    - review the edited manuscript and proof, and
    - make decisions about releasing manuscript information to the media, federal agencies, or both.

If I am the only author, I will be the corresponding author and agree to handle these responsibilities.

- B. I have given final approval of the submitted manuscript.  
 Yes  No
- C. I have, or a coauthor has, had sufficient access to the data to verify the manuscript's scientific integrity.  
 Yes  No
- D. I have participated sufficiently in the manuscript to take public responsibility for (check only one)  
 part of the content  the whole content.
- E. To qualify for authorship, you must have made substantial contributions to the intellectual content of the paper. Please indicate your contribution(s) to this manuscript. Check all that apply.
- conceived and designed the research
  - acquired the data
  - analyzed and interpreted the data
  - performed statistical analysis
  - handled funding and supervision
  - drafted the manuscript
  - made critical revision of the manuscript for important intellectual content
  - other (specify) \_\_\_\_\_

## 2. Acknowledgment Section (for Corresponding Author Only).

Authors should obtain written permission from all individuals who are listed in the Acknowledgments section of the manuscript, because readers may infer their endorsement of

data and conclusions. The corresponding author must sign the following statement, certifying that (1) all persons who have made substantial contributions in the manuscript (eg, data collection, analysis, or writing or editing assistance), but who do not fulfill authorship criteria, are named with their specific contributions in the Acknowledgments section of the manuscript; (2) all persons named in the Acknowledgments section have provided the corresponding author with written permission to be named in the manuscript; and (3) if an Acknowledgments section is not included, no other persons have made substantial contributions to this manuscript.

Corresponding Author's Signature: [Signature]

## 3. Copyright Transfer Agreement.

The American Heart Association, Inc. (AHA), a New York not-for-profit corporation, located at 7272 Greenville Avenue, Dallas, Texas 75231, and the Author hereby agree:

In consideration of the AHA reviewing and editing the Work described below for first and exclusive publication,

Journal Genetics  
Manuscript number 964627  
First author Lewis  
Title of Work Genetic Variation in PEAR1 is Associated w/ Platelet...

The author who signs below hereby assigns, conveys, and otherwise transfers all rights, title, interest, and copyright ownership in this Work to the AHA when the AHA accepts it for publication.

- "Work" means the material submitted for publication plus any other related material submitted to the AHA.
- The rights assigned to the AHA include (but are not limited to) the rights to
  - edit, publish, reproduce, distribute copies, prepare derivative works, include in indexes or search databases in print, electronic, or other media, (whether or not they are used when this agreement is executed), and
  - claim copyright in this Work throughout the world for as long as it is copyrighted, including renewals or extensions.

All accepted Works become the AHA's property and may not be published elsewhere without the AHA's prior written permission.

- Authors may use parts of the Work (eg, tables, figures) in subsequent works without asking the AHA's permission.

For Works created under grant and accepted for publication in an AHA journal, the author may cause the Accepted Version of the Work to be posted on the Web archive of a body that funded all or part of the Work, and/or an author's institutional repository, provided that this post appears no sooner than 6 months after the AHA publishes the Work in a journal and that

# Authorship Responsibility and Copyright Transfer Agreement

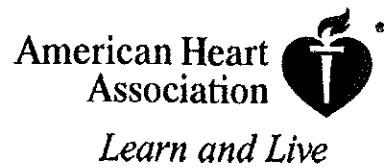

Each author must read and sign the statements in sections 1. (Authorship Responsibility, Criteria, and Contributions) and 3. (either Copyright Transfer or For U.S. Government Employee Authors). If needed, photocopy and distribute this document to coauthors.

Journal Caprietics Manuscript number 964627 First author Lewis, Joshua

the archive is publicly and noncommercially available via the World Wide Web.

- The "Accepted Version" means the paper includes peer review changes but not AHA's copyediting and production changes.
- "No sooner than 6 months after the AHA publishes the Work" means at least 6 months after the first appearance of the Work either on the AHA journal's Web site as a publish-ahead-of-print article or on the AHA journal's Web site published as part of a regular issue.

### Public Access Policy Funding Disclosure:

Please disclose below if the author has received funding for research on which the article is based from any of the following organizations:

- National Institutes of Health (NIH)
- Wellcome Trust
- Howard Hughes Medical Institute (HHMI)
- Other (please list) \_\_\_\_\_

Authors hereby represent and warrant that

- they are the sole authors of the Work,
- all authors have participated in and agree with the content and Work's conclusions,
- the Work is original and does not infringe upon any copyright, proprietary, or personal right of any third party, and
- no part of it nor any Work based on substantially similar data has been submitted to another journal for publication.

If the AHA does not publish this Work, the authors will be notified and all rights given to the AHA will revert to them. If this is a joint Work, all coauthors must transfer rights in this Work to the AHA by executing this Agreement. This Agreement must be executed as is without revision or substitution of terms. The author's original, handwritten signature is required. This Agreement is governed by the laws of the United States.

Author's Printed Name: Alan Shuldiner  
Signature: [Handwritten Signature]  
Date Signed: 1/31/2013

### For U.S. Government Employee Authors:

The person signing below hereby warrants that the Work described above was written by United States Government employees as part of their official duties and so may be published and reproduced without restriction. (All nongovernment employee authors or coauthors must sign the prior portion of this agreement transferring copyright.)

Author's Printed Name: Alan Shuldiner  
Signature: [Handwritten Signature]  
Date Signed: 1/31/2013
